1 The natural stilbenoid (–)-hopeaphenol inhibits cellular entry of SARS-CoV-2 USA-WA1/2020,

2 B.1.1.7 and B.1.351 variants

3

4 Ian Tietjen <sup>a, #</sup>, Joel Cassel <sup>a</sup>, Emery T. Register <sup>a</sup>, Xiang Yang Zhou <sup>a</sup>, Troy E. Messick <sup>a</sup>,

5 Frederick Keeney <sup>a</sup>, Lily D. Lu <sup>a</sup>, Karren D. Beattie <sup>b</sup>, Topul Rali <sup>c</sup>, Hildegund C. J. Ertl <sup>a</sup>, Joseph

6 M. Salvino <sup>a</sup>, Rohan A. Davis <sup>b</sup>, and Luis J. Montaner <sup>a, #</sup>

7

8 <sup>a</sup>The Wistar Institute, Philadelphia, PA, USA

9 <sup>b</sup>Griffith Institute for Drug Discovery, School of Environment and Science, Griffith University,

10 Brisbane, QLD, Australia

11 <sup>c</sup>School of Natural and Physical Sciences, The University of Papua New Guinea, Port Moresby,

12 PNG

13

14 Running title: Hopeaphenol inhibits entry of SARS-CoV-2 variants

15

16 # Correspondence: [itietjen@wistar.org](mailto:itietjen@wistar.org); [montaner@wistar.org](mailto:montaner@wistar.org)

17

18 Abstract word count: 237; Importance word count: 106

19 Text word count: 5179

## 20 **Abstract**

21           Antivirals are urgently needed to combat the global SARS-CoV-2/COVID-19 pandemic,  
22 supplement existing vaccine efforts, and target emerging SARS-CoV-2 variants of concern.  
23 Small molecules that interfere with binding of the viral spike receptor binding domain (RBD) to  
24 the host ACE2 receptor may be effective inhibitors of SARS-CoV-2 cell entry. Here we screened  
25 512 pure compounds derived from natural products using a high-throughput RBD/ACE2 binding  
26 assay and identified (–)-hopeaphenol, a resveratrol tetramer, in addition to vatalbinoside A and  
27 vaticanol B, as potent and selective inhibitors of RBD/ACE2 binding and viral entry. For  
28 example, (–)-hopeaphenol disrupted RBD/ACE2 binding with a 50% inhibitory concentration  
29 (IC<sub>50</sub>) of 0.11 μM in contrast to an IC<sub>50</sub> of 28.3 μM against the unrelated host ligand/receptor  
30 binding pair PD-1/PD-L1 (selectivity index = 257.3). When assessed against the USA-  
31 WA1/2020 variant, (–)-hopeaphenol also inhibited entry of a VSVΔG-GFP reporter pseudovirus  
32 expressing SARS-CoV-2 spike into ACE2-expressing Vero-E6 cells and *in vitro* replication of  
33 infectious virus in cytopathic effect assays (IC<sub>50</sub> = 10.2 μM) without cytotoxicity. Notably, (–)-  
34 hopeaphenol also inhibited two emerging variants of concern originating from the United  
35 Kingdom (B.1.1.7) and South Africa (B.1.351) in both cytopathic effect and spike-containing  
36 pseudovirus assays with similar (B.1.1.7) or improved (B.1.351) efficacies over the USA-  
37 WA1/2020 variant. These results identify (–)-hopeaphenol and related stilbenoid analogues as  
38 potent and selective inhibitors of viral entry across multiple SARS-CoV-2 variants including  
39 those with increased infectivity and/or reduced susceptibility to existing vaccines.

40

## 41 **Importance**

42 SARS-CoV-2 antivirals are needed to supplement existing vaccine efforts and target  
43 emerging viral variants with increased infectivity or reduced susceptibility to existing vaccines.  
44 Here we show that (–)-hopeaphenol, a naturally-occurring stilbenoid compound, in addition to its  
45 analogues vatalbinoside A and vaticanol B, inhibit SARS-CoV-2 by blocking the interaction of  
46 the viral spike protein with the cellular ACE2 entry receptor. Importantly, in addition to  
47 inhibiting the early USA-WA1/2020 SARS-CoV-2 variant, hopeaphenol also inhibits emerging  
48 variants of concern including B.1.1.7 (“United Kingdom variant”) and B.1.351 (“South Africa  
49 variant”), with improved efficacy against B.1.351. (–)-Hopeaphenol therefore represents a new  
50 antiviral lead against infection from multiple SARS-CoV-2 variants.

## 51 **Introduction**

52           Severe acute respiratory syndrome coronavirus 2 (SARS-CoV-2) is the causative agent of  
53 Coronavirus Disease 2019 (COVID-19). Since crossing into humans in late 2019, SARS-CoV-2  
54 has continued to cause substantial human morbidity and mortality worldwide. While SARS-  
55 CoV-2 vaccines are in development with several approved for emergency use, access to these  
56 vaccines remains limited, particularly in low and middle-income countries. Moreover, vaccine  
57 hesitancy and ongoing mutation of SARS-CoV-2 increase the risk of vaccine resistance. Finally,  
58 no reliable therapeutics are currently available to combat SARS-CoV-2 in those that have  
59 already developed COVID-19 or to mitigate SARS-CoV-2 spread to exposed individuals. Thus,  
60 SARS-CoV-2 antivirals are urgently needed to complement ongoing vaccination efforts.

61           One attractive therapeutic target of SARS-CoV-2 replication is its binding and entry into  
62 host cells, which is induced by the trimeric viral spike glycoprotein (1). A primary cellular  
63 receptor of SARS-CoV-2 entry is the angiotensin-converting enzyme II (ACE2) protein. Viral  
64 entry is mediated by the receptor binding domain (RBD) of the S1 segment of spike, which  
65 directly interacts with ACE2, while S2 mediates membrane fusion (2-3). Following RBD/ACE2  
66 binding, SARS-CoV-2 gains entry to host cells through both an endosomal, clathrin-dependent  
67 pathway as well as a clathrin-independent pathway which involves spike protein cleavage by  
68 furin, TMPRSS2, and other host proteases (1-2). Antagonism of the RBD/ACE2 interaction  
69 would therefore be expected to block SARS-CoV-2 entry and replication.

70           Since its worldwide outbreak in early 2020, SARS-CoV-2 variants have acquired  
71 mutations within Spike that enhance binding to ACE2 and increase infectivity, as first detected  
72 by the emergence of a D614G mutation which has since spread worldwide (4). More recently,  
73 additional variants have emerged with further spike sequence divergence; these include B.1.1.7,

74 which originated in the United Kingdom, and B.1.351 (also called 501Y.V2) from South Africa  
75 (5). The B.1.1.7 variant contains an additional N501Y mutation within the RBD that causes  
76 reduced antibody neutralization by both convalescent and vaccine sera *in vitro* (6). Concerningly,  
77 the B.1.351 variant, which along with N501Y has also acquired mutations E484K and K417N  
78 within the RBD, has further reduced susceptibility to, or escape from, neutralizing antibodies as  
79 well as sera from convalescent and vaccine-treated patients and immunized mice (7-8). As these  
80 observations may raise future concerns about the long-term efficacy of existing vaccines,  
81 additional countermeasures with the potential to target emerging SARS-CoV-2 variants are  
82 essential.

83 Pure compounds derived from natural products are a rich source of antivirals including  
84 against coronaviruses (9). However, outside of computational studies, few natural products to  
85 date have been demonstrated to act on SARS-CoV-2 replication (10). To identify natural  
86 product-derived compounds that may inhibit entry across multiple SARS-CoV-2 variants, we  
87 developed an AlphaScreen-based RBD/ACE2 interaction assay to screen a pure compound  
88 library containing 512 natural products and derivatives sourced predominantly from plants,  
89 mushrooms and marine invertebrates of Australia, Papua New Guinea, and neighboring regions  
90 (11-12). The top hits from this screen, which included the plant stilbenoids (–)-hopeaphenol,  
91 vatalbinoside A, and vaticanol B (**Figure 1**), were then assessed for *in vitro* mechanisms of  
92 action using SARS-CoV-2 pseudoviruses and antiviral efficacy using infectious SARS-CoV-2  
93 variants encompassing parental and B.1.1.7 and B.1.351 variants.

94

## 95 **Results**

### 96 **Stilbenoids selectively inhibit the SARS-CoV-2 spike RBD / host ACE2 protein interaction**

97 To identify potential inhibitors of SARS-CoV-2 entry, we used AlphaScreen technology  
98 (13) to develop a high-throughput, 384 well plate-based assay to monitor the interaction of  
99 SARS-CoV-2 Spike RBD with host ACE2 (**Figure 2A**). Briefly, a SARS-CoV-2 RBD protein  
100 derived from USA-WA1/2020 and containing a C-terminal His tag, in addition to a full-length  
101 ACE2 peptide with a C-terminal Fc tag, were pre-bound to respective acceptor and donor beads  
102 and co-incubated for 3 hours at room temperature. When a ligand/receptor binding event occurs,  
103 excitation at 680 nm results in a singlet oxygen transfer between donor and receptor beads,  
104 which results in luminescence at 615 nm. Compounds that inhibit binding of RBD to ACE2  
105 should therefore inhibit luminescence. In the absence of compounds, we observed that  
106 luminescence was highly dependent on concentrations of both RBD and ACE2 (**Figure 2A**) with  
107 a > 200-fold signal to noise ratio and high reproducibility across experiments ( $Z' > 0.8$ ) (14).

108 Using this assay, we then screened 512 pure compounds obtained from natural products  
109 and semisynthetic derivatives available from Compounds Australia at Griffith University at 1  
110  $\mu\text{M}$ , where 9 (1.8%) inhibited > 75% of fluorescence observed in the absence of compounds.  
111 Activities of top compounds were then assessed for dose-response profiles, where the three most  
112 active hits were a series of stilbenoid resveratrol tetramers including (-)-hopeaphenol,  
113 vatalbinoside A, and vaticanol B (**Figure 1; Figure 2B**). These stilbenoids, exemplified by  
114 hopeaphenol, are tetramers of resveratrol available from multiple plant sources (15). Using the  
115 RBD/ACE2 AlphaScreen assay described above, dose-response profiles from 5 independent  
116 experiments were obtained to calculate 50% inhibitory concentrations ( $\text{IC}_{50}$ s) of 0.11, 0.24, and  
117 0.067  $\mu\text{M}$  for hopeaphenol, vatalbinoside A, and vaticanol B, respectively (**Table 1**). In contrast,  
118 almost no activity was observed in this assay by the resveratrol monomer ( $\text{IC}_{50} > 100 \mu\text{M}$ ;  
119 **Figure 2B**), indicating that inhibition requires a multimeric structure.

120 To confirm selectivity of hopeaphenol and analogues to disrupt the RBD/ACE2  
121 interaction, we next assessed their ability to interfere with the unrelated host PD-1/PD-L1  
122 ligand/receptor pair using a comparable and previously-described experimental approach (16),  
123 where we observed a > 100-fold signal to noise ratio and  $Z' > 0.75$  (**Figure 2C**). In this assay,  
124 the control PD-1/PD-L1 antagonist BMS-1166 (17) disrupted bead proximity-based fluorescence  
125 with an IC<sub>50</sub> of 0.0040  $\mu\text{M}$  (**Figure 2D**) but had no activity against the RBD/ACE2 interaction  
126 (IC<sub>50</sub> > 100  $\mu\text{M}$ ; data not shown). Conversely, hopeaphenol, vatalbinoside A, and vaticinol B  
127 were all substantially less effective in disrupting PD-1/PD-L1, with IC<sub>50</sub>s of 28.3, 23.3, and 16.6  
128  $\mu\text{M}$ , respectively (**Figures 2D; Table 1**). From these two assays, the selectivity indices of  
129 hopeaphenol, vatalbinoside A, and vaticinol B [i.e., IC<sub>50</sub> (PD-1/PD-L1) / IC<sub>50</sub> (RBD/ACE2)]  
130 were calculated to be 257.3, 92.9, and 247.8, respectively, indicating high selectivity of these  
131 compounds for disrupting the viral RBD/host ACE2 interaction over an unrelated host  
132 ligand/receptor pair.

133

#### 134 **Stilbenoids are weak inhibitors of viral main protease**

135 A recent high-throughput virtual screening study proposed that hopeaphenol may act as  
136 an inhibitor of the SARS-CoV-2 main protease ( $M^{\text{pro}}$ ) by interfering with its active site (18),  
137 thereby raising the possibility of hopeaphenol acting on multiple viral targets. To test this  
138 possibility, we also developed an  $M^{\text{pro}}$  enzymatic assay using an  $M^{\text{pro}}$  peptide substrate  
139 resembling those described previously (19), where a C-terminal 5-((2-  
140 aminoethyl)amino)naphthalene-1-sulfonic acid (EDANS) fluorescent tag is quenched by an N-  
141 terminal 4-((4-(dimethylamino)phenyl)azo)benzoic acid (DABCYL) tag. Following incubation  
142 with recombinant  $M^{\text{pro}}$ , the cleaved substrate affords separation of the EDANS tag from the

143 DABCYL quencher and detection of fluorescence at 490 nm. Compounds that inhibit M<sup>pro</sup>  
144 activity are therefore expected to inhibit fluorescence. This assay also exhibited a > 10-fold  
145 signal to noise ratio and  $Z' > 0.6$  (**Figure 3A**) and was adaptable to 384-well screening format.

146 Using this assay, we observed that the control M<sup>pro</sup> inhibitor GC-376 blocked enzymatic  
147 activity with an IC<sub>50</sub> of 0.0052  $\mu$ M, consistent with previous observations (**Figure 3B**) (19-20).  
148 In contrast, we observed that hopeaphenol, vatalbinoside A, and vaticanol B inhibited M<sup>pro</sup>  
149 activity with IC<sub>50</sub>s of 42.5, 68.7 and 47.6  $\mu$ M, respectively (**Figure 3B; Table 1**), suggesting  
150 that these stilbenoids, while potentially capable of targeting M<sup>pro</sup>, are to a first approximation  
151 more effective against RBD binding to ACE2.

152

### 153 **Stilbenoids inhibit SARS-CoV-2 spike-dependent viral entry**

154 To assess whether hopeaphenol and analogues inhibit viral entry within a cellular  
155 context, we generated a single-cycle pseudovirus consisting of a vesicular stomatitis virus (VSV)  
156 backbone lacking the G fusion protein and expressing SARS-CoV-2 spike protein and green  
157 fluorescent protein (GFP) reporter (VSV $\Delta$ G-S-GFP) (21). In our initial experiments, we  
158 generated pseudovirus with spike from the USA-WA1/2020 variant. Pseudovirus was then  
159 incubated with cells in the presence or absence of stilbenoids. High-content imaging was then  
160 used to count total live and infected cells in each culture, as determined by Hoechst-stained  
161 nuclei and cellular GFP fluorescence, respectively. Consistent with previous observations (22-  
162 23), VSV $\Delta$ G-S-GFP pseudovirus infected ACE2-expressing cells like Vero-E6 (**Figure 4A**) (24)  
163 but not cell lines lacking ACE2 like BHK-21 cells (data not shown). In this assay, we observed  
164 an average of  $2.5 \pm 0.1\%$  GFP-positive cells (mean  $\pm$  s.e.m.) following 24 hours' incubation with  
165 pseudovirus and 0.1% DMSO vehicle control (**Figure 4A**) with no major changes in number of



166 cell nuclei relative to uninfected cells (**Figure 4B**). Additionally, no major changes in total cell  
167 nuclei were observed in the presence of up to 50  $\mu\text{M}$  of any compound, indicating no overt  
168 effects on cell viability, with the exception of 50  $\mu\text{M}$  resveratrol which resulted in cultures with  
169  $60.3 \pm 7.0\%$  of nuclei observed in untreated, infected cells (**Figure 4B**).

170         However, when Vero-E6 cells were infected with pseudovirus in the presence of 50  $\mu\text{M}$   
171 hopeaphenol, GFP fluorescence was present in only  $28.4 \pm 2.1\%$  of infected cells treated with  
172 0.1% DMSO (**Figure 4A, C**). Similar results were observed when infected cells were co-treated  
173 with 50  $\mu\text{M}$  vatalbinoside A, where  $38.5 \pm 14.8\%$  of GFP-positive cells were observed relative to  
174 infected, vehicle-treated cells (**Figure 4C**). In contrast, 50  $\mu\text{M}$  vaticanol B resulted in GFP  
175 expression in  $84.8 \pm 9.7\%$  of cells, indicating that the potent anti-RBD/ACE2 activity observed  
176 by AlphaScreen assay was not reproduced in the pseudotype assay. As expected, 50  $\mu\text{M}$   
177 resveratrol had no effect on GFP-positive cells ( $96.4 \pm 13.3\%$  GFP expression of infected,  
178 vehicle-treated cells; **Figure 4C**). However, no compound inhibited GFP expression when  
179 incubated with infected cells at 15  $\mu\text{M}$  (data not shown). Taken together, these results indicate  
180 that at least a subset of stilbenoids can inhibit entry of pseudoviruses expressing SARS-CoV-2  
181 spike protein *in vitro*, consistent with AlphaScreen assay results, although this occurs at much  
182 higher concentrations.

183

#### 184 **Stilbenoids inhibit infectious SARS-CoV-2 replication**

185         To confirm cellular antiviral activity of hopeaphenol and analogues, we next used a  
186 cytopathic effect (CPE)-based assay with infectious virus in Vero-E6 cells (25-26). Briefly,  
187 Vero-E6 cells were treated with compounds for 2 hours in 8-fold replicates in 96-well format  
188 before infection with 50x median tissue culture infectious dose (TCID<sub>50</sub>) of SARS-CoV-2

189 (USA-WA1/2020 variant). Cells were then incubated for 4 days with daily scoring of CPE across  
190 all wells by a user blinded to experimental conditions. Using this approach, we observed the  
191 presence of CPE by 2 days post infection, as characterized by extensive cell rounding and  
192 cellular debris that were observable by light microscopy (**Figure 5A**, arrows). By 4 days post-  
193 infection, this CPE was widespread across the cell culture and clearly distinguishable from  
194 uninfected cell controls (**Figure 5A**). When low micromolar concentrations of either the control  
195 nucleoside analog remdesivir or the M<sup>Pro</sup> inhibitor GC-376 (27-28) were added 2 hours before  
196 infection, CPE was completely inhibited in these cultures after 4 days (**Figure 5B**, top and  
197 middle), with calculated EC<sub>50</sub>s of 2.5 and 3.9  $\mu$ M for remdesivir and GC-376, respectively  
198 (**Figure 5C; Table 1**). Moreover, comparable activity was observed in the presence of  
199 hopeaphenol (**Figure 5B**, bottom), which blocked SARS-CoV-2 replication after 4 days with a  
200 calculated EC<sub>50</sub> of 10.2  $\mu$ M (**Figure 5C; Table 1**). Notably, while similar antiviral activity was  
201 observed with vatalbinoside A (EC<sub>50</sub> = 13.8  $\mu$ M), we observed substantially less efficacy by  
202 vaticanol B (EC<sub>50</sub> = 37.0  $\mu$ M; **Figure 5C; Table 1**), consistent with its reduced efficacy in  
203 pseudovirus assays (**Figure 4C**). In contrast, no antiviral activity was observed by up to 100  $\mu$ M  
204 resveratrol (**Figure 5C**). We also observed no evidence of cytotoxicity by these compounds, as  
205 measured by resazurin staining following 4 days treatment of uninfected Vero-E6 cells (**Figure**  
206 **5D**). These results indicate that hopeaphenol and vatalbinoside A, and to a lesser extent vaticanol  
207 B, inhibit SARS-CoV-2 replication *in vitro*, with efficacy of hopeaphenol at the same order of  
208 magnitude as control SARS-CoV-2 antivirals remdesivir and GC-376.

209

210 **(-)-Hopeaphenol inhibits SARS-CoV-2 variants of concern with improved efficacy against**  
211 **B.1.351.**

212 To determine if hopeaphenol maintained activity against emerging SARS-CoV-2 variants  
213 with accumulated mutations in the spike RBD, we repeated the CPE assay using two SARS-  
214 CoV-2 variants of concern including B.1.1.7 (England/204820464/2020; “UK variant”) and  
215 B.1.351 (KRISP-K005325/2020; “South Africa variant”) (**Figure 6**). Similar to our previous  
216 observations, infection of Vero-E6 cells with either strain resulted in widespread CPE across  
217 cultures after 4 days (**Figure 6A**, top), which was completely abolished by pre-treatment with 3  
218  $\mu\text{M}$  remdesivir (**Figure 6A**, middle). We also observed dose-dependent inhibition of these two  
219 variants by remdesivir, with calculated  $\text{EC}_{50}$ s of 1.5 and 1.4  $\mu\text{M}$  for B.1.1.7 and B.1.351 strains,  
220 respectively (**Figure 6B**), which also approximated observations with USA-WA1/2020 virus  
221 ( $\text{EC}_{50} = 2.5 \mu\text{M}$ ; Table 1). Notably, 15  $\mu\text{M}$  hopeaphenol also completely abrogated CPE by both  
222 variants (**Figure 6A**, bottom). When assessed for dose-response profiles, we observed that  
223 B.1.1.7 was inhibited by hopeaphenol with an  $\text{EC}_{50}$  of 14.8  $\mu\text{M}$  (**Figure 6C**), which  
224 approximated hopeaphenol’s efficacy against USA-WA1/2020 ( $\text{IC}_{50} = 10.2 \mu\text{M}$ ; **Table 1**). In  
225 contrast, B.1.351 was inhibited by hopeaphenol with an  $\text{IC}_{50}$  of 2.3  $\mu\text{M}$  (**Figure 6C**), indicating  
226 4.5-fold improved efficacy over USA-WA1/2020 (**Table 1**).

227 To confirm that the antiviral activities of hopeaphenol against these variants of concern  
228 corresponded to inhibition of viral entry, we generated VSV $\Delta\text{G}$ -S-GFP-based pseudoviruses  
229 containing B.1.1.7 or B.1.351 spike sequences and infected Vero-E6 cells in the absence or  
230 presence of 50  $\mu\text{M}$  hopeaphenol (**Figure 7**). Similar to previous observations (**Figure 4B**), no  
231 major changes in total cell nuclei number were observed under any experimental condition (data  
232 not shown). Also broadly consistent with previous observations with our original pseudovirus,  
233 we observed an average of  $8.2 \pm 2.9$  and  $6.0 \pm 0.5\%$  GFP-positive cells following 24 hours’  
234 incubation with pseudovirus containing B.1.1.7 or B.1.351 spike, respectively (**Figure 7A**, top).

235 Furthermore, infection of both pseudoviruses continued to be inhibited by 50  $\mu$ M hopeaphenol  
236 (**Figure 7A**, bottom). For example, pseudovirus containing B.1.1.7 spike was observed in only  
237  $22.9 \pm 7.6\%$  of cells relative to infected, vehicle-treated cells treated with 0.1% DMSO (**Figure**  
238 **7B**), similar to results from pseudovirus plus USA-WA1/2020 spike ( $28.4 \pm 2.1\%$ ). In contrast,  
239 pseudovirus containing B.1.351 spike was present in only  $15.3 \pm 1.3\%$  of infected, vehicle-  
240 treated cells when compared to infected cells without 50  $\mu$ M hopeaphenol treatment (**Figure**  
241 **7B**), indicating a 1.9-fold improved efficacy over USA-WA1/2020 spike-containing pseudovirus.

242 Taken together, these results indicate that hopeaphenol inhibits both replication of  
243 infectious SARS-CoV-2 variants of concern *in vitro* and entry of pseudoviruses containing  
244 divergent SARS-CoV-2 spike sequences as well as improved efficacy against the B.1.351  
245 variant.

246

## 247 **Discussion**

248 Antivirals that act across multiple SARS-CoV-2 variants are needed worldwide to  
249 supplement emerging vaccine efforts. Here we investigated a library of pure compounds derived  
250 from 512 pure natural products and derivatives and identified three stilbenoids, exemplified by (–  
251 )-hopeaphenol, that disrupt the interaction of viral spike RBD with its host ACE2 receptor, block  
252 viral entry of spike-containing pseudoviruses, and antagonize infectious SARS-CoV-2  
253 replication without cytotoxicity *in vitro*. Importantly, hopeaphenol also inhibits two emerging  
254 variants of concern (B.1.1.7 and B.1.351) which have acquired sequence variations that enhance  
255 SARS-CoV-2 infectivity and/or promote reduced susceptibility or escape from neutralizing  
256 antibodies. Hopeaphenol and other stilbenoid analogues are therefore promising leads for

257 developing broad-spectrum SARS-CoV-2 entry inhibitors, potentially for use as monotherapies  
258 or in combination with antiviral leads against other viral targets.

259 (–)-Hopeaphenol, vatalbinoside A, vaticanol B, and related stilbenoids and their  
260 stereoisomers have been isolated from a variety of plant sources including *Hopea*, *Vitis*, *Shorea*,  
261 *Anisoptera*, and *Vatica* species, among others (29-37). These compounds have been reported to  
262 exhibit several *in vitro* properties including antiproliferative (32-33, 37-38), antibacterial  
263 (through inhibition of the type III secretion system of Gram-negative bacteria) (30, 39),  
264 antifungal (40), anti-influenza and herpes simplex virus (41-42), and anti-inflammatory (34, 43)  
265 activities, among others. Notably, hopeaphenol is additionally reported to inhibit plasma  
266 triglyceride elevation in olive oil-treated mice and reduce plasma glucose in sucrose-loaded mice  
267 at 200 mg/kg (44-45). It also exhibited hepatoprotective effects against LPS-induced liver injury  
268 in mice at 100 mg/kg (34). These initial *in vivo* efficacy studies, which indicate tolerability at  
269 high concentrations, support near-term *in vivo* studies of anti-SARS-CoV-2 efficacy by (–)-  
270 hopeaphenol.

271 More recently, stilbenoids have been proposed as potential disruptors of SARS-CoV-2  
272 spike protein with ACE2 in molecular docking studies (46). Another stilbenoid, kobophenol A,  
273 was also recently reported to inhibit binding of RBD with ACE2 (IC<sub>50</sub> = 1.8 μM) and SARS-  
274 CoV-2 replication (EC<sub>50</sub> = 71.6 μM) (47), and our data are consistent with these observations.  
275 However, we observed no antiviral activity by resveratrol at up to 100 μM, which contrasts with  
276 another recent study reporting an EC<sub>50</sub> of 10.7 μM in SARS-CoV-2-infected Vero-E6 cells  
277 (BetaCov isolate) (48). However, this latter study measured supernatant viral RNA levels by  
278 quantitative PCR after 48 hours' infection, and so disparate results could reflect differences in  
279 sensitivity between quantitative PCR and CPE-based assays. Another consideration is that the

280 three hit stilbenoid compounds, as polyphenolics, represent a structure class that has been given a  
281 PAINS (Pan Assay Interference compoundS) designation (49). Although we observed that these  
282 compounds selectively disrupted RBD/ACE2 binding over an unrelated PD-1/PD-L1  
283 ligand/receptor pair, for example with 257.3-fold selectivity for hopeaphenol, caution must still  
284 be taken when considering these compounds for further therapeutic development. However,  
285 generation or isolation of stilbenoid analogues with potentially improved selectivity as well as  
286 assessment of chemical leads in primary cell models remain warranted.

287 While the three stilbenoids identified here selectively disrupted RBD/ACE2 interactions  
288 at sub-micromolar concentrations over an unrelated PD-1/PD-L1 ligand/receptor pair, and we  
289 observed efficacy at low micromolar concentrations in CPE assays, inhibitory activity against  
290 spike-containing pseudoviruses occurred only at 50  $\mu\text{M}$ . These observations could partially  
291 reflect reduced stability of these stilbenoids *in vitro* and/or reduced efficacy against VSV-  
292 backbone pseudoviruses in particular. Stilbenoids are also sensitive to oxidation due to the  
293 presence of the phenolic moieties and their ability to delocalize an unpaired electron (50) They  
294 are also unstable to factors including oxygen, heat, light and pH changes (51-52). Consistent  
295 with the potential for reduced stability, vaticanol B, while consistently the most potent disruptor  
296 of RBD/ACE2 interactions by AlphaScreen, was ~3-fold less effective than hopeaphenol and  
297 vatalbinoside A in both pseudovirus and CPE assays (**Table 1**). Assessment of additional  
298 analogues and derivatives may also mitigate this concern.

299 A recent report also describes use of a virtual screening approach which identified  
300 hopeaphenol as a potential inhibitor of SARS-CoV-2 M<sup>pro</sup> by interacting within its active site  
301 (18). In contrast, we observed only weak inhibitory activity of hopeaphenol and analogues  
302 against M<sup>pro</sup> (e.g., IC<sub>50</sub>s = ~40 – 70  $\mu\text{M}$ , compared to 0.0052  $\mu\text{M}$  for GC-376; **Table 1**). While

303 our studies do not rule out modest inhibition of M<sup>pro</sup> by hopeaphenol, this activity is unlikely to  
304 confer the primary antiviral activity observed *in vitro* (e.g. hopeaphenol EC50s = 2.3 – 10.2  $\mu$ M  
305 in CPE assays; **Table 1**). Support for this hypothesis also comes from our observations that  
306 hopeaphenol has similarly improved activity against the B.1.351 variant in both CPE and  
307 pseudovirus assays, indicating that hopeaphenol's efficacy is dependent on spike sequence.  
308 Nevertheless, these combined results do raise the intriguing possibility of identifying stilbenoid  
309 derivatives that target both SARS-CoV-2 entry and M<sup>pro</sup>, which in turn may improve antiviral  
310 efficacy and/or reduce the risk of eventual viral drug resistance.

311         There are currently no licensed antivirals that reliably protect against COVID-19. Recent  
312 reports of SARS-CoV-2 variants with accumulated spike mutations and reduced susceptibility or  
313 escape from neutralizing sera from convalescent and vaccine-treated patients (7-8) also raise the  
314 concern of emerging variants with resistance to existing vaccines. In contrast, we observe that  
315 hopeaphenol, despite acting as an inhibitor of spike-mediated viral entry, inhibits CPE of both an  
316 early SARS-CoV-2 isolate (USA-WA1/2020) as well as two recently emerging variants of  
317 concern (B.1.1.7 and B.1.351), with improved efficacy against the antibody escape variant  
318 B.1.351. These results suggest that spike mutations that promote vaccine-induced viral escape  
319 may be distinct from those that might arise from ongoing treatment with hopeaphenol and  
320 potentially other stilbenoid-based entry inhibitors. Although further studies are clearly needed,  
321 this possibility, in turn, raises the possibility of natural product-based entry inhibitors that  
322 function as effective antiviral countermeasures in the absence of available second-generation  
323 vaccines.

324

325 **Materials and Methods**

326 **Chemical libraries and hit compounds**

327           The Davis Open Access Natural Product-Based Library consists of 512 distinct  
328 compounds, the majority (53%) of which are natural products obtained primarily from Australian  
329 fungal, plant, and marine invertebrate sources (11-12), as well as semi-synthetic natural product  
330 analogues (28%) and known commercial drugs or synthetic compounds inspired by natural  
331 products (19%). All compounds evaluated in this study were analyzed for purity prior to testing  
332 and shown to be > 95% pure. Compounds were initially provided by Compounds Australia at  
333 Griffith University in 5 mM stock solutions dissolved in dimethyl sulfoxide (DMSO; Millipore,  
334 Burlington, MA, USA); as such, DMSO was used as the vehicle control in this study. The three  
335 hit compounds identified following library screening, which are all known stilbenoids (30), were  
336 re-supplied as dry powders for confirmation studies and further biological evaluation.

337

338 **Cells, viruses, and reagents**

339           Vero-E6 cells were obtained from the American Tissue Culture Collection. Vero-E6 cells  
340 were cultured in D10+ media [Dulbecco's Modified Eagle Medium with 4.5 g/L glucose and L-  
341 glutamine (Gibco, Gaithersburg, MD), 10% fetal bovine serum (Gemini Bio Products, West  
342 Sacramento, CA, USA), 100 U of penicillin/mL, and 100 µg of streptomycin/mL (Sigma-  
343 Aldrich, St. Louis, MO)] in a humidified incubator at 37 °C and 5% CO<sub>2</sub>. BHK-21/WI-2 cells  
344 were purchased from Kerfast (Boston, MA, USA) and cultured in D5+ media, which is identical  
345 to D10+ media except for addition of 5% fetal bovine serum.

346           The following reagent was deposited by the Centers for Disease Control and Prevention  
347 and obtained through BEI Resources, NIAID, NIH: SARS-Related Coronavirus 2, Isolate USA-  
348 WA1/2020, NR-52281. The following reagents were obtained through BEI Resources, NIAID,



349 NIH: SARS-Related Coronavirus 2, Isolate hCoV-19/England/204820464/2020, NR-54000,  
350 contributed by Bassam Hallis and SARS-Related Coronavirus 2, Isolate hCov-19/South  
351 Africa/KRISP-K005325/2020, NR-54009, contributed by Alex Sigal and Tulio de Oliveira.

352 Remdesivir and resveratrol were purchased from Sigma-Aldrich. GC-376 was purchased  
353 from Selleckchem (Houston, TX, USA). Isolation, structural confirmation, and purity of (-)-  
354 hopeaphenol, vatalbinoside A, and vaticanol B used in this study were reported previously (30).

355

### 356 **Protein-protein interaction assays**

357 SARS-CoV-2 Spike-RBD binding to ACE2 was determined using AlphaScreen  
358 technology. 2 nM of ACE2-Fc (Sino Biological, Chesterbrook, PA, USA) was incubated with 5  
359 nM HIS-tagged SARS-CoV-2 Spike-RBD (Sino Biological) in the presence of 5 µg/mL nickel  
360 chelate donor bead in a total of 10 µL of 20 mM Tris (pH 7.4), 150 mM KCl, and 0.05% CHAPS  
361 in white, opaque, low-volume 384-well plates. Test compounds were diluted to 100x final  
362 concentration in 100% DMSO. 5 µL of ACE2-Fc/Protein A acceptor bead was first added to the  
363 plate, followed by 100 nL of test compounds and then 5 µL of CoV-Spike-RBD-HIS/Nickel  
364 chelate donor beads. Test compounds were added to each well using a Janus Nanohead  
365 (PerkinElmer, Waltham, MA, USA). For each experiment, all conditions were performed in  
366 duplicate. Following 2 h incubation at room temperature, AlphaScreen fluorescent signals were  
367 measured using a ClarioStar plate reader (BMG Labtech, Cary, NC, USA). Data were  
368 normalized to percent inhibition, where 100% equaled the AlphaScreen signal in the absence of  
369 SARS-CoV-2-Spike-RBD-His and 0% equaled AlphaScreen signal in the presence of both  
370 proteins and DMSO alone.

371 PD-1 binding to PD-L1 was also determined using AlphaScreen technology. 0.5 nM of  
372 human PD-L1-Fc (Sino Biological) was incubated with 5 nM HIS-tagged human PD-1 (Sino  
373 Biological) in the presence of 5  $\mu\text{g}/\text{mL}$  protein A AlphaScreen acceptor bead and 5  $\mu\text{g}/\text{mL}$  nickel  
374 chelate donor bead in a total volume of 10  $\mu\text{L}$  of 20 mM HEPES (pH 7.4), 150 mM NaCl, and  
375 0.005% Tween in white, opaque low-volume 384-well plates. 5  $\mu\text{L}$  of PD-L1-Fc/protein A  
376 acceptor bead was first added to the plate, followed by 100 nL of test compound prepared as  
377 described above, followed by 5  $\mu\text{L}$  of PD-1-His/nickel chelate donor bead. For each experiment,  
378 all conditions were performed in duplicate. Following 2 h incubation at room temperature, data  
379 were collected as described above and normalized to percent inhibition, where 100% equaled the  
380 AlphaScreen signal in the absence of PD-1-His, and 0% equaled AlphaScreen signal in the  
381 presence of both proteins and 0.1% DMSO alone.

382

### 383 **Generation of M<sup>pro</sup> protein**

384 The codon-optimized gene for SARS-CoV-2 M<sup>pro</sup> (or 3CL<sup>pro</sup>) (GenBank: QHD43415.1  
385 aa 3264-3567) from strain BetaCoV/Wuhan/WIV04/2019 was ordered from IDT (Coralville, IA,  
386 USA) and cloned into a HIS-SUMO expression vector (a modified pET-DUET; Novagen,  
387 Madison, WI, USA). After transformation into BL21(DE3), the HIS-SUMO-M<sup>pro</sup> fusion protein  
388 was expressed using the autoinduction method (53) with 500 mL cultures at 22 °C overnight.  
389 Cell pellets were resuspended in a buffer containing 25 mM Tris pH 8.5, 20 mM imidazole 200  
390 mM NaCl, 5 mM b-mercaptoethanol and lysed using sonication and lysozyme and centrifuged at  
391 high speed. The supernatant was applied to a Ni-NTA (nickel-nitrilotriacetic acid) column at 4  
392 °C and washed with the resuspension buffer. The fusion protein was then eluted using a buffer  
393 300 mM imidazole, 200 mM NaCl and 5 mM b-mercaptoethanol, concentrated and applied to a

394 gel filtration column (HiLoad 26/60 Superdex 75; Cytiva, Marlborough, MA) and equilibrated  
395 with the resuspension buffer. Fractions with > 90% purity were pooled and incubated with  
396 SUMO protease at 4 °C overnight. After cleavage, the digested protein solution was applied  
397 twice to a 5 mL HIS-TRAP Ni-NTA column (Cytiva) to remove the HIS-SUMO and SUMO  
398 protease, and the flow-through was collected. Finally, the protein was concentrated and applied  
399 to a second gel filtration column (HiLoad 26/60 Superdex 75; Cytiva) equilibrated with 25 mM  
400 HEPES pH 7.5, 150 mM NaCl, 2 mM TCEP. Purity (> 95%) was confirmed using an SDS-  
401 PAGE gel.

402

### 403 **M<sup>Pro</sup> enzymatic assays**

404 Protease activity of recombinant M<sup>Pro</sup> was measured using the quenched fluorogenic  
405 substrate {DABCYL}-Lys-Thr- Ser-Ala-Val-Leu-Gln-Ser-Gly-Phe-Arg-Lys-Met-Glu-  
406 (EDANS)-NH<sub>2</sub> (Bachem, Vista, CA, USA). 5 µL of 25 nM M<sup>Pro</sup> diluted in assay buffer [25 mM  
407 HEPES (pH 7.4), 150 mM NaCl, 5 mM DTT, 0.005% Tween) was dispensed into black, low-  
408 volume 384-well plates. Test compounds were serially diluted into 100% DMSO, and 0.1 µL  
409 was added to the assay using a Janus MDT Nanohead (PerkinElmer). Assays were initiated by  
410 addition of 5 µL of 5 µM fluorogenic substrate, and fluorescence at 355 nm excitation and 460  
411 nm emission was monitored every 5 minutes for 50 minutes using an Envision plate reader  
412 (PerkinElmer). Rate of substrate cleavage was determined using linear regression of the raw data  
413 values obtained during the time course. Slopes of these progress curves were then normalized to  
414 percent inhibition, where 100% equaled rate in the absence of M<sup>Pro</sup> (which was typically 0), and  
415 0% equaled rate of cleavage in the presence of M<sup>Pro</sup> and 0.1% DMSO.

416

417 **Generation of VSV $\Delta$ G-S-GFP pseudoviruses**

418 SARS-CoV-2 USA-WA1/2020 cDNA was obtained as a gift from Dr. Stephen J.  
419 Elledge. B.1.1.7 spike cDNA was generated from USA-WA1/2020 spike cDNA by standard  
420 PCR mutagenesis, and B.1.351 spike cDNA was synthesized (Genscript, Piscataway, NJ, USA).  
421 Pseudoviruses were generated in BHK-21/WI-2 cells using a pseudotyped  $\Delta$ G-GFP (G\* $\Delta$ G-  
422 GFP) rVSV (Kerafast, Boston, MA, USA) in addition to spike sequences cloned into the paT7-  
423 Spike plasmid as described previously (21). 2 hours following chemical transfection of spike  
424 plasmid, cells were infected with  $\Delta$ G-GFP (G\* $\Delta$ G-GFP) rVSV. Following 24 hours incubation,  
425 supernatants were harvested, aliquoted, and stored at -80 °C.

426

427 **Pseudovirus-based infectivity assays**

428 12,500 Vero-E6 cells resuspended 12.5  $\mu$ L D10+ were plated in 384  $\mu$ L plates, followed  
429 by addition of 6.25  $\mu$ L of test agents diluted in D10+ at 4X desired final concentration plus 6.25  
430  $\mu$ L of undiluted pseudovirus stock (total 25  $\mu$ L reaction volumes). All experimental conditions  
431 with test agents were performed in duplicate, and control cells with or without pseudovirus in the  
432 presence of 0.1% DMSO vehicle control were tested 4-fold. Cells were incubated at 37 °C and  
433 5% CO<sub>2</sub> for 24 hours. Cells were then stained with 25  $\mu$ L of 5  $\mu$ g/mL Hoechst 33342 (Sigma  
434 Aldrich), incubated for 20 minutes, and fixed with paraformaldehyde to 2% final concentration.  
435 High content imaging was then performed using a Nikon Eclipse Ti Inverted Microscope and  
436 Nikon NIS Elements AR Software Version 5.30.02 (Nikon Americas Inc., Melville, NY, USA).  
437 For each image, cell nuclei and GFP-positive cells were counted, with GFP positive cells  
438 reported as percent of total nuclei within each image.

439

440 **Resazurin cell viability assay**

441 20,000 Vero-E6 cells were plated in 96-well plates and incubated overnight before  
442 addition of compounds at defined concentrations. 0.1% DMSO vehicle control was added to  
443 wells in the absence of test compounds. All experimental conditions were performed in  
444 duplicate. Cells were then incubated at 37 °C and 5% CO<sub>2</sub> for 4 days before addition of resazurin  
445 (Sigma Aldrich) to a final concentration of 20 µg/mL. Cells were incubated for an additional 4  
446 hours before fluorescence intensity was measured using a ClarioStar plate reader (BMG  
447 Labtech). Background fluorescence was subtracted from wells containing resazurin and D10+  
448 media but no cells.

449

450 **Generation of SARS-CoV-2 viruses**

451 3 x 10<sup>6</sup> Vero-E6 cells were incubated in 15 mL of D10+ media for 24 hours. Cells were  
452 then washed and replaced with 10 mL of D10+ containing virus at a multiplicity of infection  
453 MOI of 0.001. Cells were incubated for 5 – 7 days until clear CPE was observed throughout the  
454 flask. Media was harvested and split into 250 µL aliquots for storage at -80 °C.

455 To titer virus stocks, Vero-E6 cells were first plated to 20,000 cells per well in 96-well  
456 format in D10+ media and incubated for 24 hours. Following incubation, cells were incubated in  
457 fresh D10+ containing 5-fold serial dilutions of a thawed virus aliquot (8 total dilutions, 5-fold  
458 replicates) and incubated for an additional 4 days. Wells were then scored for the presence of  
459 CPE. TCID<sub>50</sub>s were calculated using the Reed-Muench method.

460

461 **Viral CPE assays**

462 Vero-E6 cells were plated in D10+ to 20,000 cells per well in 96-well format and  
463 incubated for 24 hours. Following incubation, compounds were added to final concentrations in  
464 8-fold replicates and incubated for an additional 2 hours before addition of 50x TCID<sub>50</sub> of virus.  
465 Each 96-well plate further contained uninfected cells and infected cells with 0.1% DMSO  
466 vehicle control in 4-fold replicates. Cells were incubated for an additional 4 days, at which point  
467 all wells were scored for the presence of CPE by a user blinded to the identity of the wells.

468

#### 469 **Data analysis**

470 For all studies, 50% effective concentrations were calculated using nonlinear regression  
471 of a one-side binding model using GraphPad Prism v. 8.4.3 (GraphPad, San Diego, CA, USA).  
472 All data are presented as the mean  $\pm$  s.e.m. from at least 3 independent experiments.

473

#### 474 **Acknowledgements**

475 We are indebted to Dr. Stephen J. Elledge for providing SARS-CoV-2 spike cDNA for  
476 this study. Funding was provided by the Wistar Science Discovery Fund (L.J.M., J.S.), Canadian  
477 Institutes for Health Research (CIHR PJT-153057) (I.T.) and a Griffith University–Simon Fraser  
478 University Collaborative Travel Grant (I.T., R.A.D.). The authors acknowledge the National  
479 Health and Medical Research Council (APP1024314 to R.A.D.), and the Australian Research  
480 Council for support towards NMR and MS equipment (LE0668477, LE140100119, and  
481 LE0237908) and a linkage research grant (LP120200339 to R.A.D.). R.A.D. acknowledges the  
482 NatureBank biota repository ([https://www.griffith.edu.au/institute-drug-discovery/unique-](https://www.griffith.edu.au/institute-drug-discovery/unique-resources/naturebank)  
483 [resources/naturebank](https://www.griffith.edu.au/institute-drug-discovery/unique-resources/naturebank)) from which the majority of compounds found within the Davis open  
484 access natural product-based library were purified. Compounds Australia

485 (<https://www.griffith.edu.au/griffith-sciences/compounds-australia>) is acknowledged for  
486 curating, plating and shipping the Davis open access library. This work was also supported by  
487 the following grants to L.J.M.: the Robert I. Jacobs Fund of The Philadelphia Foundation and the  
488 Herbert Kean, M.D., Family Professorship.

489

## 490 **References**

491 1. Xiu S, Dick A, Ju H, Mirzaie S, Abdi F, Cocklin S, Zhan P, Liu X. 2020. Inhibitors of SARS-  
492 CoV-2 entry: Current and future opportunities. *J Med Chem* 63:12256-12274.

493

494 2. Hoffmann M, Kleine-Weber H, Schroeder S, Krüger N, Herrler T, Erichsen S, Schiergens TS,  
495 Herrler G, Wu NH, Nitsche A, Müller MA, Drosten C, Pöhlmann S. 2020. SARS-CoV-2 cell  
496 entry depends on ACE2 and TMPRSS2 and is blocked by a clinically proven protease inhibitor.  
497 *Cell* 181:271-280.

498

499 3. Wrapp D, Wang N, Corbett KS, Goldsmith JA, Hsieh CL, Abiona O, Graham BS, McLellan  
500 JS. 2020. Cryo-EM structure of the 2019-nCoV spike in the prefusion conformation. *Science*  
501 367:1260-1263.

502

503 4. Hou YJ, Chiba S, Halfmann P, Here C, Kuroda M, Dinno KH 3<sup>rd</sup>, Leist SR, Schäfer A,  
504 Nakajima N, Takahashi K, Lee RE, Mascenik TM, Graham R, Edwards CE, Tse LV, Okuda K,  
505 Markmann AJ, Bartlt L, de Silva A, Margolis DM, Boucher RC, Randell SH, Suzuki T,  
506 Gralinski LE, Kawaoka Y, Baric RS. 2020. SARS-CoV-2 D614G variant exhibits efficient  
507 replication *ex vivo* and transmission *in vivo*. *Science* 370:1464-1468.

508

509 5. Wang P, Nair MS, Liu L, Iketani S, Luo Y, Guo Y, Wang M, Yu J, Zhang B, Kwong PD,  
510 Graham BS, Mascola JR, Chang JY, Yin MT, Sobieszczyk M, Kyratsous CA, Shapiro L, Sheng  
511 Z, Huang Y, Ho DD. 2021. Antibody resistance of SARS-CoV-2 variants B.1.351 and B.1.1.7.  
512 Nature doi: [10.1038/s41586-021-03398-2](https://doi.org/10.1038/s41586-021-03398-2).

513

514 6. Supasa P, Zhou D, Dejnirattisai W, Liu C, Mentzer AJ, Ginn HM, Zhao Y, Duyvesteyn HME,  
515 Nutalai R, Tuekprakhon A, Wang B, Paesen GC, Slon-Campos J, López-Camacho C, Hallis B,  
516 Coombes N, Bewley KR, Charlton S, Walter TS, Barnes E, Dunachie SJ, Skelly D, Lumley SF,  
517 Baker N, Shaik I, Humphries HE, Godwin K, Gent N, Sienkiewicz A, Dold C, Levin R, Dong T,  
518 Pollard AJ, Knight JC, Klenerman P, Crook D, Lambe T, Clutterbuck E, Bibi S, Flaxman A,  
519 Bittaye M, Belij-Rammerstorfer S, Gilbert S, Hall DR, Williams MA, Paterson NG, James W,  
520 Carroll MW, Fry EE, Mongkolsapaya J, Ren J, Stuart DI, Screaton GR. 2021. Reduced  
521 neutralization of SARS-CoV-2 B.1.1.7 variant by convalescent and vaccine sera. Cell doi:  
522 [10.1016/j.cell.2021.02.033](https://doi.org/10.1016/j.cell.2021.02.033).

523

524 7. Li Q, Nie J, Wu J, Zhang L, Ding R, Wang H, Zhang Y, Li T, Liu S, Zhang M, Zhao C, Liu H,  
525 Nie L, Qin H, Wang M, Lu Q, Li X, Liu J, Liang H, Shi Y, Shen Y, Xie L, Zhang L, Qu X, Xu  
526 W, Huang W, Wang Y. 2021. SARS-CoV-2 501Y.V2 variants lack higher infectivity but do  
527 have immune escape. Cell doi: [10.1016/j.cell.2021.02.042](https://doi.org/10.1016/j.cell.2021.02.042).

528

529 8. Zhou D, Dejnirattisai W, Supasa P, Liu C, Mentzer AJ, Ginn HM, Zhao Y, Duyvesteyn HME,  
530 Tuekprakhon A, Nutalai R, Wang B, Paesen GC, Lopez-Camacho C, Slon-Campos J, Hallis B,



- 531 Coombes N, Bewley K, Charlton S, Walter TS, Skelly D, Lumley SF, Dold C, Levin R, Dong T,  
532 Pollard AJ, Knight JC, Crook D, Lambe T, Clutterbuck E, Bibi S, Flaxman A, Bittaye M, Belij-  
533 Rammerstorfer S, Gilbert S, James W, Carroll MW, Klenerman P, Barnes E, Dunachie SJ, Fry  
534 EE, Mongkolsapaya J, Ren J, Stuart DI, Screaton GR. 2021. Evidence of escape of SARS-CoV-2  
535 variant B.1.351 from natural and vaccine-induced sera. *Cell* doi: 10.1016/j.cell.2021.02.037.  
536
- 537 9. Islam MT, Sarkar C, El-Kersh DM, Jamaddar S, Uddin SJ, Shilpi JA, Mubarak MS. 2020.  
538 Natural products and their derivatives against coronavirus: A review of the non-clinical and pre-  
539 clinical data. *Phytother Res* 34:2471-2492.  
540
- 541 10. Vougiannopoulou K, Corona A, Tramontano E, Alexis MN, Skaltsounis AL. 2021.  
542 Natural and nature-derived products targeting human coronaviruses. *Molecules* 26:448.  
543
- 544 11. Zulfiqar B, Jones AJ, Sykes ML, Shelper TB, Davis RA, Avery VM. 2017. Screening a  
545 natural product-based library against kinetoplastid parasites. *Molecules* 22:1715.  
546
- 547 12. Askin S, Bond THE, Sorenson AE, Moreau MJJ, Antony H, Davis RA, Schaeffer PM. 2018.  
548 Selective protein unfolding: A universal mechanism of action for the development of irreversible  
549 inhibitors. *Chem Commun (Camb)* 54:1738-1741.  
550
- 551 13. Yasgar A, Jadhav A, Simeonov A, Coussens NP. 2016. AlphaScreen-based assays: Ultra-  
552 high-throughput screening for small-molecule inhibitors of challenging enzymes and protein-  
553 protein interactions. *Methods Mol Biol* 1439:77-98.

- 554
- 555 14. Bray MA, Carpenter A. 2017. Advanced assay development guidelines for image-based high  
556 content screening and analysis. In: Markossian S, Sittampalam GS, Grossman A, Brimacombe  
557 K, Arkin M, Auld D, Austin CP, Baell J, Caaveiro JMM, Chung TDY, Coussens NP, Dahlin JL,  
558 Devanaryan V, Foley TL, Glicksman M, Hall MD, Haas JV, Hoare SRJ, Inglese J, Iversen PW,  
559 Kahl SD, Kales SC, Kirshner S, Lal-Nag M, Li Z, McGee J, McManus O, Riss T, Saradjian P,  
560 Trask OJ Jr, Weidner JR, Wildey MJ, Xia M, Xu X, (eds), Assay Guidance Manual [Internet].  
561 Bethesda (MD). Eli Lilly & Company and the National Center for Advancing Translational  
562 Sciences.
- 563
- 564 15. Goufo P, Singh RK, Cortez I. 2020. A reference list of phenolic compounds (including  
565 stilbenes) in grapevine (*Vitis vinifera* L.) roots, woods, canes, stems, and leaves. Antioxidants  
566 (Basel) 9:398.
- 567
- 568 16. Lung J, Hung MS, Lin YC, Hung CH, Chen CC, Lee KD, Tsai YH. 2020. Virtual screening  
569 and in vitro evaluation of PD-1 dimer stabilizers for uncoupling PD-1/PD-L1 interaction from  
570 natural products. Molecules 25:5293.
- 571
- 572 17. Skalniak L, Zak KM, Guzik K, Magiera K, Musielak B, Pachota M, Szelazek B, Kocik J,  
573 Grudnik P, Tomala M, Krzanik S, Pyrc K, Dömling A, Dubin G, Holak TA. 2017. Small-  
574 molecule inhibitors of PD-1/PD-L1 immune checkpoint alleviate the PD-L1-induced exhaustion  
575 of T cells. Oncotarget 8:72167-72181.
- 576

- 577 18. Sharma P, Vijayan V, Pant P, Sharma M, Vikram N, Kaur P, Singh TP, Sharma S. 2020.  
578 Identification of potential drug candidates to combate COVID-19: A structural study using the  
579 main protease (mpro) of SARS-CoV-2. *J Biomol Struct Dyn* doi:  
580 10.1080/07391102.2020.1798286.  
581
- 582 19. Ma C, Sacco MD, Hurst B, Townsend JA, Hu Y, Szeto T, Zhang X, Tarbet B, Marty MT,  
583 Chen Y, Wang J. 2020. Boceprevir, GC-376, and calpain inhibitors II, XII inhibit SARS-CoV-2  
584 viral replication by targeting the main protease. *Cell Res* 30:678-692.  
585
- 586 20. Fu L, Ye F, Feng Y, Yu F, Wang Q, Wu Y, Zhao C, Sun H, Huang B, Niu P, Song H, Shi Y,  
587 Li X, Tan W, Qi J, Gao GF. 2020. Both boceprevir and GC376 efficaciously inhibit SARS-CoV-  
588 2 by targeting its main protease. *Nat Commun* 11:4417.  
589
- 590 21. Whitt MA. 2010. Generation of VSV pseudotypes using recombinant  $\Delta$ G-VSV for studies on  
591 virus entry, identification of entry inhibitors, and immune responses to vaccines. *J Virol Methods*  
592 169:365-374.  
593
- 594 22. Li W, Moore MJ, Vasilieva N, Sui J, Wong SK, Berne MA, Somasundaran M, Sullivan JL,  
595 Luzuriaga K, Greenough TC, Choe H, Farzan M. 2003. Angiotensin-converting enzyme 2 is a  
596 functional receptor for the SARS coronavirus. *Nature* 426:450-454.  
597
- 598 23. Conceicao C, Thakur N, Human S, Kelly JT, Logan L, Bialy D, Bhat S, Stevenson-Leggett  
599 P, Zagrajek AK, Hollinghurst P, Varga M, Tsirigoti C, Tully M, Chiu C, Moffat K, Silesian AP,

600 Hammond JA, Maier HJ, Bickerton E, Shelton H, Dietrich I, Graham SC, Bailey D. 2020. The  
601 SARS-CoV-2 Spike protein has a broad tropism for mammalian ACE2 proteins. *PLoS Biol*  
602 18:e3001016.

603

604 24. Ren X, Glende J, Al-Falah M, de Vries V, Schwegmann-Wessels C, Qu X, Tan L, Tschernig  
605 T, Deng H, Naim HY, Herrler G. 2006. Analysis of ACE2 in polarized epithelial cells: surface  
606 expression and function as receptor for severe acute respiratory syndrome-associated  
607 coronavirus. *J Gen Virol* 87(Pt 6):1691-1695.

608

609 25. Case JB, Bailey AL, Kim AS, Chen RE, Diamond MS. 2020. Growth, detection,  
610 quantification, and inactivation of SARS-CoV-2. *Virology* 548:39-48.

611

612 26. Gorshkov K, Chen CZ, Bostwick R, Rasmussen L, Xu M, Pradhan M, Tran BN, Zhu W,  
613 Shamim K, Huang W, Hu X, Shen M, Klumpp-Thomas C, Itkin Z, Shinn P, Simeonov A,  
614 Michael S, Hall MD, Lo DC, Zheng W. 2020. The SARS-CoV-2 cytopathic effect is blocked  
615 with autophagy modulators. *ACS Infect Dis* doi: 10.1021/acsinfecdis.0c00349.

616

617 27. Pruijssers AJ, George AS, Schäfer A, Leist SR, Gralinski LE, Dinnon KH 3rd, Yount BL,  
618 Agostini ML, Stevens LJ, Chappell JD, Lu X, Hughes TM, Gully K, Martinez DR, Brown AJ,  
619 Graham RL, Perry JK, Du Pont V, Pitts J, Ma B, Babusis D, Murakami E, Feng JY, Bilello JP,  
620 Porter DP, Cihlar T, Baric RS, Denison MR, Sheahan TP. 2020. Remdesivir inhibits SARS-  
621 CoV-2 in human lung cells and chimeric SARS-CoV expressing the SARS-CoV-2 RNA  
622 polymerase in mice. *Cell Rep* 32:107940.

- 623
- 624 28. Vuong W, Khan MB, Fischer C, Arutyunova E, Lamer T, Shields J, Saffran HA, McKay RT,  
625 van Belkum MJ, Joyce MA, Young HS, Tyrrell DL, Vederas JC, Lemieux MJ. 2020. Feline  
626 coronavirus drug inhibits the main protease of SARS-CoV-2 and blocks virus replication. *Nat*  
627 *Commun* 11:4282.
- 628
- 629 29. Tanaka T, Ito T, Ido Y, Son TK, Nakaya K, Iinuma M, Ohyama M, Chelladurai V. 2000.  
630 Stilbenoids in the stem bark of *Hopea parviflora*. *Phytochemistry* 53:1015-1019.
- 631
- 632 30. Davis RA, Beattie KD, Xu M, Yang X, Yin S, Holla H, Healy PC, Sykes M, Shelper T,  
633 Avery VM, Elofsson M, Sundin C, Quinn RJ. 2014. Solving the supply of resveratrol tetramers  
634 from Papua New Guinean rainforest *Anisoptera* species that inhibit bacterial type III secretion  
635 systems. *J Nat Prod* 77:2633-2640.
- 636
- 637 31. Lin YS, Chen CR, Wu WH, Wen CL, Chang CI, Hou WC. 2015. Anti- $\alpha$ -glucosidase and  
638 anti-dipeptidyl peptidase IV activities of extracts and purified compounds from *Vitis thunbergia*  
639 var. *taiwaniana*. *J Agric Food Chem* 63:6393-6401.
- 640
- 641 32. Moriyama H, Moriyama M, Ninomiya K, Morikawa T, Hayakawa T. 2016. Inhibitory effects  
642 of oligostilbenoids from the bark of *Shorea roxburghii* on malignant melanoma cell growth:  
643 Implications for novel topical anticancer candidates. *Biol Pharm Bull* 39:1675-1682.
- 644

- 645 33. Chang CI, Chien WC, Huang KX, Hsu JL. 2017. Anti-inflammatory effects of vitisinol A  
646 and four other oligostilbenes from *Ampelopsis brevipedunculata* var. *Hancei*. *Molecules*  
647 22:1195.
- 648
- 649 34. Ninomiya K, Chaipech S, Kunikata Y, Yagi R, Pongpiriyadacha Y, Muraoka O, Morikawa  
650 T. 2017. Quantitative determination of stilbenoids and dihydroisocoumarins in *Shorea*  
651 *roxburghii* and evaluation of their hepatoprotective activity. *Int J Mol Sci* 18:451.
- 652
- 653 35. Schrader KK, Ibrahim MA, Abd-Alla HI, Cantrell CL, Pasco DS. 2018. Antibacterial  
654 activities of metabolites from *Vitis rotundifolia* (Muscadine) roots against fish pathogenic  
655 bacteria. *Molecules* 23:2761.
- 656
- 657 36. Prabha B, Sini S, Priyadarshini TS, Sasikumar P, Gopalan G, Joseph JP, Jithin MM, Sivan  
658 VV, Jayamurthy P, Radhakrishnan KV. 2019. Anti-inflammatory effect and mechanism of action  
659 of ellagic acid-3,3',4-trimethoxy-4'-O- $\alpha$ -L-rhamnopyranoside isolated from *Hopea parviflora* in  
660 lipopolysaccharide-stimulated RAW 264.7 macrophages. *Nat Prod Res* doi:  
661 10.1080/14786419.2019.1690486.
- 662
- 663 37. Aja I, Ruiz-Larrea MB, Courtois A, Krisa S, Richard T, Ruiz-Sanz JI. 2020. Screening of  
664 natural stilbene oligomers from *Vitis vinifera* for anticancer activity on human hepatocellular  
665 carcinoma cells. *Antioxidants (Basel)* 9:469.
- 666

- 667 38. Ohyama M, Tanaka T, Ito T, Iinuma M, Bastow KF, Lee KH. 1999. Antitumor agents 200.  
668 Cytotoxicity of naturally occurring resveratrol oligomers and their acetate derivatives. *Bioorg*  
669 *Med Chem Lett* 9:3057-3060.  
670
- 671 39. Zetterström CE, Hasselgren J, Salin O, Davis RA, Quinn RJ, Sundin C, Elofsson M. 2013.  
672 The resveratrol tetramer (-)-hopeaphenol inhibits type III secretion in the gram-negative  
673 pathogens *Yersinia pseudotuberculosis* and *Pseudomonas aeruginosa*. *PLoS One* 8:e81969.  
674
- 675 40. Schnee S, Queiroz EF, Voinesco F, Marcourt L, Dubuis PH, Wolfender JL, Gindro K. 2013.  
676 *Vitis vinifera* canes, a new source of antifungal compounds against *Plasmopara viticola*,  
677 *Erysiphe necator*, and *Botrytis cinera*. *J Agric Food Chem* 61:5459-5467.  
678
- 679 41. Ito T, Hayashi K, Nishiguchi M, Hayashi T, Iinuma M. 2018. Resveratrol oligomer C-  
680 glucosides and anti-viral resveratrol tetramers isolated from the stem bark of *Shorea uliginosa*.  
681 *Phytochem Lett* 28:1-7.  
682
- 683 42. Mattio LM, Catinella G, Pinto A, Dallavalle S. 2020. Natural and nature-inspired stilbenoids  
684 as antiviral agents. *Eur J Med Chem* 202:112541.  
685
- 686 43. Tabata Y, Takano K, Ito T, Iinuma M, Yoshimoto T, Miura H, Kitao Y, Ogawa S, Hori O.  
687 2007. Vaticanol B, a resveratrol tetramer, regulates endoplasmic reticulum stress and  
688 inflammation. *Am J Physiol Cell Physiol* 293:C411-418.  
689

- 690 44. Morikawa T, Chaipech S, Matsuda H, Hamao M, Umeda Y, Sato H, Tamura H, Ninomiya K,  
691 Yoshikawa M, Pongpiriyadacha Y, Hayakawa T, Muraoka O. 2012. Anti-hyperlipidemic  
692 constituents from the bark of *Shorea roxburghii*. J Nat Med 66:516-524.  
693
- 694 45. Morikawa T, Chaipech S, Matsuda H, Hamao M, Umeda Y, Sato H, Tamura H, Kon'I H,  
695 Ninomiya K, Yoshikawa M, Pongpiriyadacha Y, Hayakawa T, Muraoka O. 2012.  
696 Antidiabetogenic oligostilbenoids and 3-ethyl-4-phenyl-3,4-dihydroisocoumarins from the bark  
697 of *Shorea roxburghii*. Bioorg Med Chem 20:832-840.  
698
- 699 46. Wahedi HM, Ahmad S, Abbasi SW. 2020. Stilbene-based natural compounds as promising  
700 drug candidates against COVID-19. J Biomol Struct Dyn doi: 10.1080/07391102.2020.1762743.  
701
- 702 47. Gangadevi S, Badavath VN, Thakur A, Yin N, De Jonghe S, Acevedo O, Jochmans D,  
703 Leyssen P, Wang K, Neyts J, Yujie T, Blum G. 2021. Kobophenol A inhibits binding of host  
704 ACE2 receptor with spike RBD domain of SARS-CoV-2, a lead compound for blocking  
705 COVID-19. J Phys Chem Lett 12:1793-1802.  
706
- 707 48. Pasquereau S, Nehme Z, Ahmad SH, Daouad F, Van Assche JV, Wallet C, Schwartz C, Rohr  
708 O, Morot-Bizot S, Herbein G. 2021. Resveratrol inhibits HCoV-229E and SARS-CoV-2  
709 coronavirus replication *in vitro*. Viruses 13:354.  
710
- 711 49. Baell JB. 2016. Feeling Nature's PAINS: Natural products, natural product drugs, and pan  
712 assay interference compounds (PAINS). J Nat Prod 79:616-628.



713

714 50. Lü JM, Lin PH, Yao Q, Chen C. 2010. Chemical and molecular mechanisms of antioxidants:  
715 Experimental approaches and model systems. *J Cell Mol Med* 14:840-860.

716

717 51. D'Archivio M, Filesi C, Vari R, Scazzocchio B, Masella R. 2010. Bioavailability of the  
718 polyphenols: Status and controversites. *Int J Mol Sci* 11:1321-1342.

719

720 52. Marín L, Miguélez EM, Villar CJ, Lombó F. 2015. Bioavailability of dietary polyphenols  
721 and gut microbiota metabolism: Antimicrobial properties. *Biomed Res Int* 2015:905215.

722

723 53. Studier FW. 2005. Protein production by auto-induction in high density shaking cultures.

724 *Protein Expr Purif* 41:207-234.

725 **Figure Legends**

726

727 **Figure 1.** Chemical structures of (–)-hopeaphenol (**A**), vatalbinoside A (**B**), vaticanol B (**C**), and  
728 resveratrol (**D**).

729

730 **Figure 2.** Identification of stilbenoids as Spike-ACE2 inhibitors by AlphaScreen. **A**,  
731 Demonstration of AlphaScreen-based fluorescence due to interactions of His-tagged Spike RBD  
732 (from USA-WA1/2020) and Fc-tagged ACE2 peptides. **B**, Dose-response curves of stilbenoids  
733 and resveratrol on fluorescence inhibition due to disruption of RBD/ACE2 interactions. **C**,  
734 Demonstration of AlphaScreen-based fluorescence due to interactions of His-tagged PD-1 and  
735 Fc-tagged PD-L1 peptides. **D**, Dose-response curves of stilbenoids and control inhibitor BMS-  
736 1166 on fluorescence inhibition due to disruption of PD-1/PD-L1 interactions.

737

738 **Figure 3.** Effects of stilbenoids on inhibition of SARS-CoV-2 M<sup>pro</sup> activity. **A**, Demonstration of  
739 recombinant M<sup>pro</sup> enzymatic activity on a FRET-based fluorogenic peptide substrate. **B**, Dose-  
740 response curves of stilbenoids and control inhibitor GC-376 on M<sup>pro</sup> enzymatic activity.

741

742 **Figure 4.** Effects of stilbenoids on *in vitro* pseudovirus entry. **A**, Representative images of  
743 uninfected Vero-E6 cells (left) or cells infected with VSVΔG-S-GFP pseudovirus containing  
744 SARS-CoV-2 Spike (USA-WA1/2020) in the absence (center) or presence of 50 μM  
745 hopeaphenol (right). Blue denotes Hoechst-stained cell nuclei, and green indicates GFP-positive  
746 infected cells. Scale bar = 100 μm. **B**, Average number of total cell nuclei per cell field as  
747 counted by high-content imaging. **C**, Level of GFP-positive (i.e., pseudovirus-infected) cells as

748 measured by high-content imaging, relative to total number of cell nuclei, in the presence of  
749 stilbenoids. In **B** and **C**, data are presented relative to pseudovirus-infected cells in the presence  
750 of 0.1% DMSO vehicle control.

751

752 **Figure 5.** Effects of stilbenoids on infectious SARS-CoV-2 replication *in vitro*. **A**,  
753 Representative images of Vero-E6 cells infected with SARS-CoV-2 (USA-WA1/2020 variant) at  
754 0 to 4 days post-infection. Arrows denote examples of CPE. **B**, Representative images of  
755 infected cells in the presence of remdesivir (top), GC-376 (middle), and hopeaphenol (bottom)  
756 after 4 days incubation at stated concentrations. Scale bars = 100  $\mu\text{m}$ . **C**, Dose-response curves  
757 of stilbenoids, resveratrol, and remdesivir and GC-376 controls on viral replication in Vero-E6  
758 cells after 4 days infection. **D**, Dose-response curves of compounds on cell viability in uninfected  
759 Vero-E6 after 4 days infection. In **C** and **D**, data are presented relative to cells treated with 0.1%  
760 DMSO vehicle control.

761

762 **Figure 6.** Effects of hopeaphenol and remdesivir on SARS-CoV-2 variant replication *in vitro*. **A**,  
763 Representative images of Vero-E6 cells following 4 days infection with either SARS-CoV-2  
764 variants B.1.1.7 (left) or B.1.351 (right) in the presence of 0.1% DMSO vehicle control (top), 3  
765  $\mu\text{M}$  remdesivir (middle), or 15  $\mu\text{M}$  hopeaphenol (bottom). Scale bar = 100  $\mu\text{m}$ . **B-C**, Dose-  
766 response curves of remdesivir (**B**) or hopeaphenol (**C**) in Vero-E6 cells following 4 days  
767 infection with SARS-CoV-2 variant B.1.1.7 or B.1.351. In **B** and **C**, data are presented relative to  
768 infected cells treated with 0.1% DMSO vehicle control.

769

770 **Figure 7.** Effects of hopeaphenol on entry of pseudoviruses containing SARS-CoV-2 spike  
771 variants. **A,** Representative images of Vero-E6 cells infected with VSV $\Delta$ G-S-GFP pseudovirus  
772 containing SARS-CoV-2 Spike from B.1.1.7 (left) or B.1.351 variants (right) in the presence of  
773 0.1% DMSO (top) or 50  $\mu$ M hopeaphenol (bottom). Images are organized as described in Figure  
774 4. **B,** Level of GFP-positive (i.e., pseudovirus-infected) cells, relative to total cell nuclei, in the  
775 presence of 0.1% DMSO or 50  $\mu$ M hopeaphenol.

776 **Table 1.** Summary of total stilbenoid and control compound bioactivities.

| Compound        | IC50 (μM)                 |                           |                      | IC50 (μM)<br>Mpro<br>Activity | % infected cells at 50 μM |         |          | EC50 (μM)             |         |     | CC50 (μM)<br>Cell<br>Viability |
|-----------------|---------------------------|---------------------------|----------------------|-------------------------------|---------------------------|---------|----------|-----------------------|---------|-----|--------------------------------|
|                 | Spike/ACE2<br>AlphaScreen | PD-1/PD-L1<br>AlphaScreen | Selectivity<br>Index |                               | VSVΔG-S-GFP pseudovirus   |         |          | Infectious SARS-CoV-2 |         |     |                                |
|                 |                           |                           |                      | WA1/2020                      | B.1.1.7                   | B.1.351 | WA1/2020 | B.1.1.7               | B.1.351 |     |                                |
| Hopeaphenol     | 0.11                      | 28.3                      | 257.3                | 42.5                          | 28.4                      | 22.9    | 15.3     | 10.2                  | 14.8    | 2.3 | > 100                          |
| Vatambinoside A | 0.24                      | 22.3                      | 92.9                 | 68.7                          | 38.5                      |         |          | 13.8                  |         |     | > 100                          |
| Vatambinol B    | 0.067                     | 16.6                      | 247.8                | 47.6                          | 84.8                      |         |          | 37.0                  |         |     | > 100                          |
| Resveratrol     | > 100                     |                           |                      |                               | 96.4                      |         |          | > 100                 |         |     | ~ 100                          |
| BMS-1166        | > 100                     | 0.0040                    |                      |                               |                           |         |          |                       |         |     |                                |
| Remdesivir      |                           |                           |                      |                               |                           |         |          | 2.5                   | 1.5     | 1.4 | > 10                           |
| GC-376          |                           |                           |                      | 0.0052                        |                           |         |          | 3.9                   |         |     | > 10                           |

777

| Compound        | IC50 (μM)                 |                           |                      | IC50 (μM)        | % infected cells at 50 μM |         |         | EC50 (μM)             |         |         | CC50 (μM)         |
|-----------------|---------------------------|---------------------------|----------------------|------------------|---------------------------|---------|---------|-----------------------|---------|---------|-------------------|
|                 | Spike/ACE2<br>AlphaScreen | PD-1/PD-L1<br>AlphaScreen | Selectivity<br>Index | Mpro<br>Activity | VSVΔG-S-GFP pseudovirus   |         |         | Infectious SARS-CoV-2 |         |         | Cell<br>Viability |
|                 |                           |                           |                      |                  | WA1/2020                  | B.1.1.7 | B.1.351 | WA1/2020              | B.1.1.7 | B.1.351 |                   |
| Hopeaphenol     | 0.11                      | 28.3                      | 257.3                | 42.5             | 28.4                      | 22.9    | 15.3    | 10.2                  | 14.8    | 2.3     | > 100             |
| Vatalbinoside A | 0.24                      | 22.3                      | 92.9                 | 68.7             | 38.5                      |         |         | 13.8                  |         |         | > 100             |
| Vaticanol B     | 0.067                     | 16.6                      | 247.8                | 47.6             | 84.8                      |         |         | 37.0                  |         |         | > 100             |
| Resveratrol     | > 100                     |                           |                      |                  | 96.4                      |         |         | > 100                 |         |         | ~ 100             |
| BMS-1166        | > 100                     | 0.0040                    |                      |                  |                           |         |         |                       |         |         |                   |
| Remdesivir      |                           |                           |                      |                  |                           |         |         | 2.5                   | 1.5     | 1.4     | > 10              |
| GC-376          |                           |                           |                      | 0.0052           |                           |         |         | 3.9                   |         |         | > 10              |

Table 1

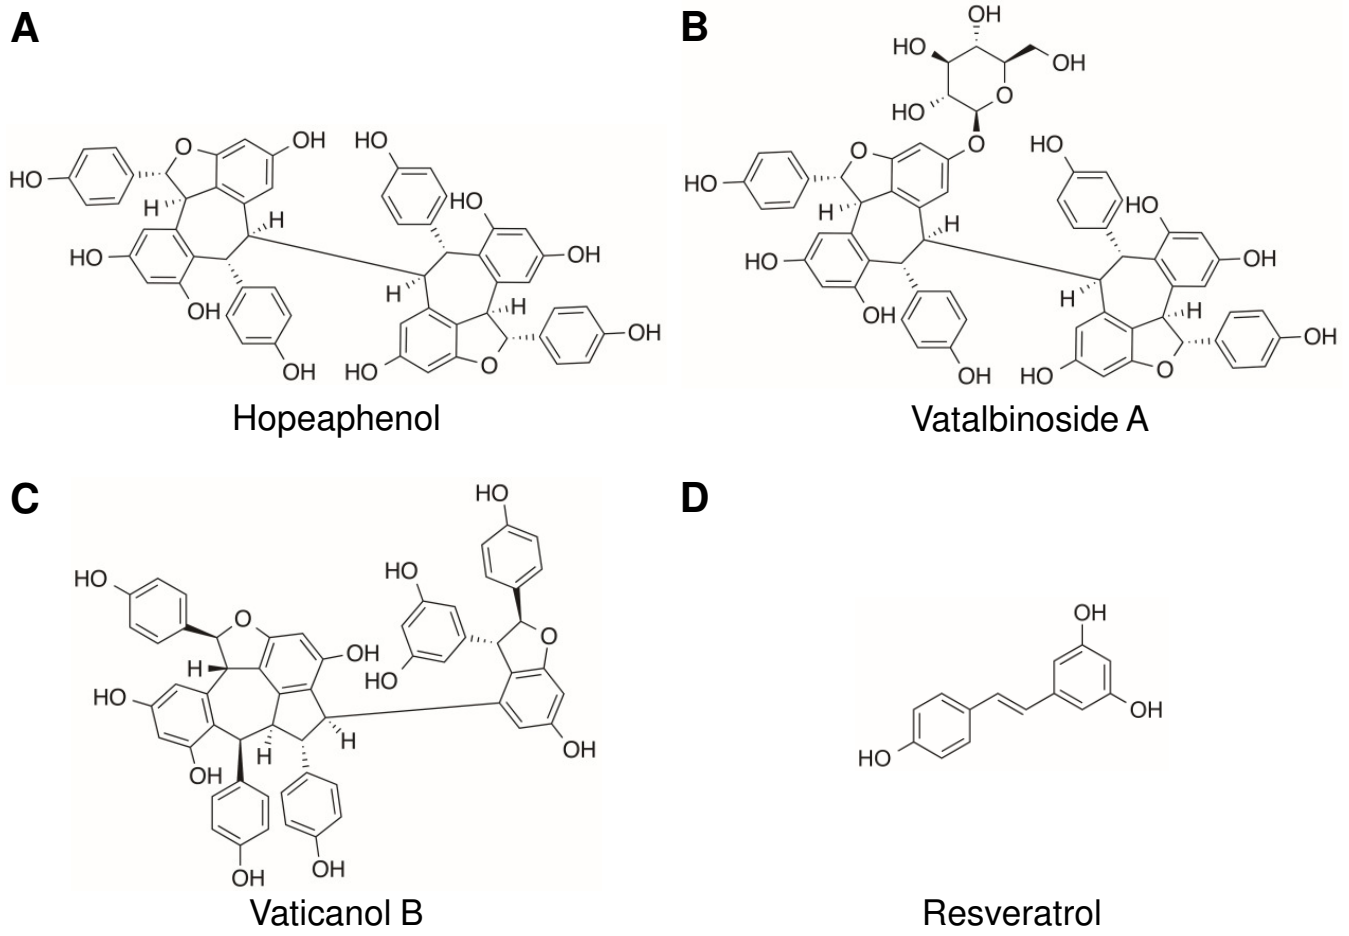

Figure 1

**A**

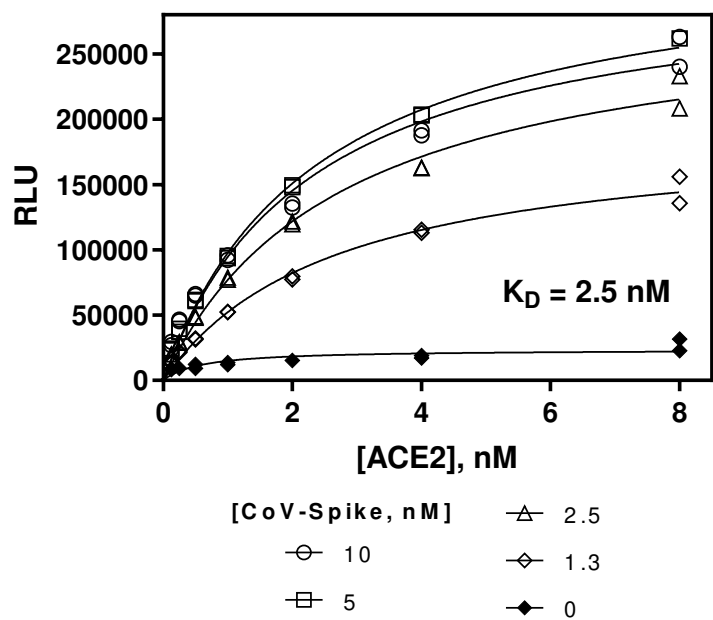

**B**

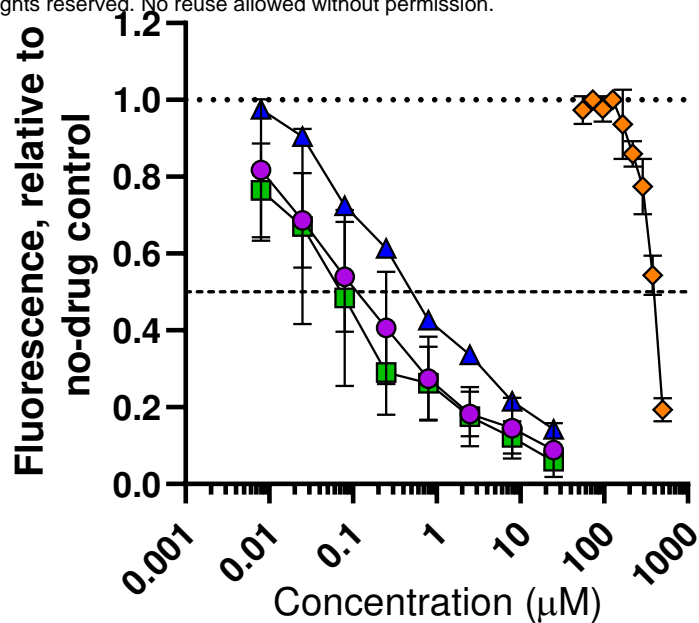

**C**

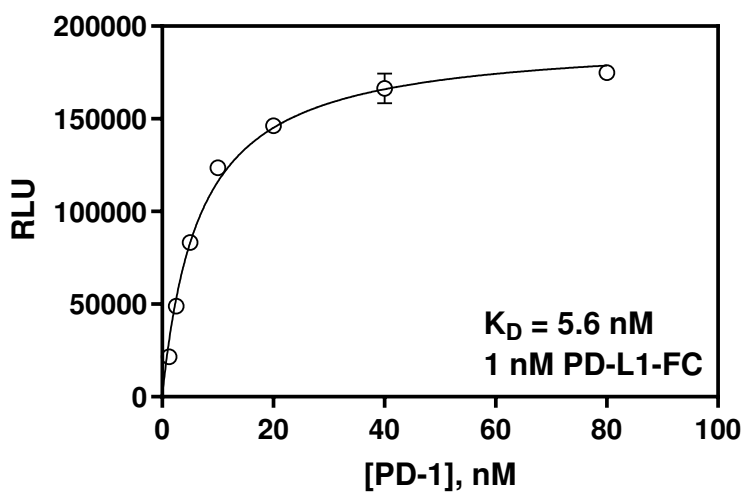

**D**

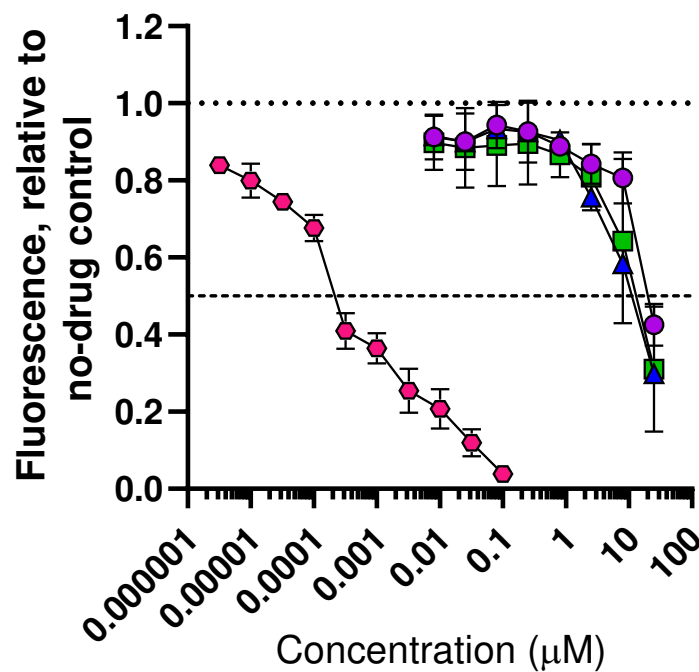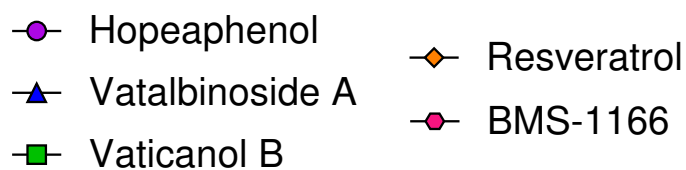

Figure 2



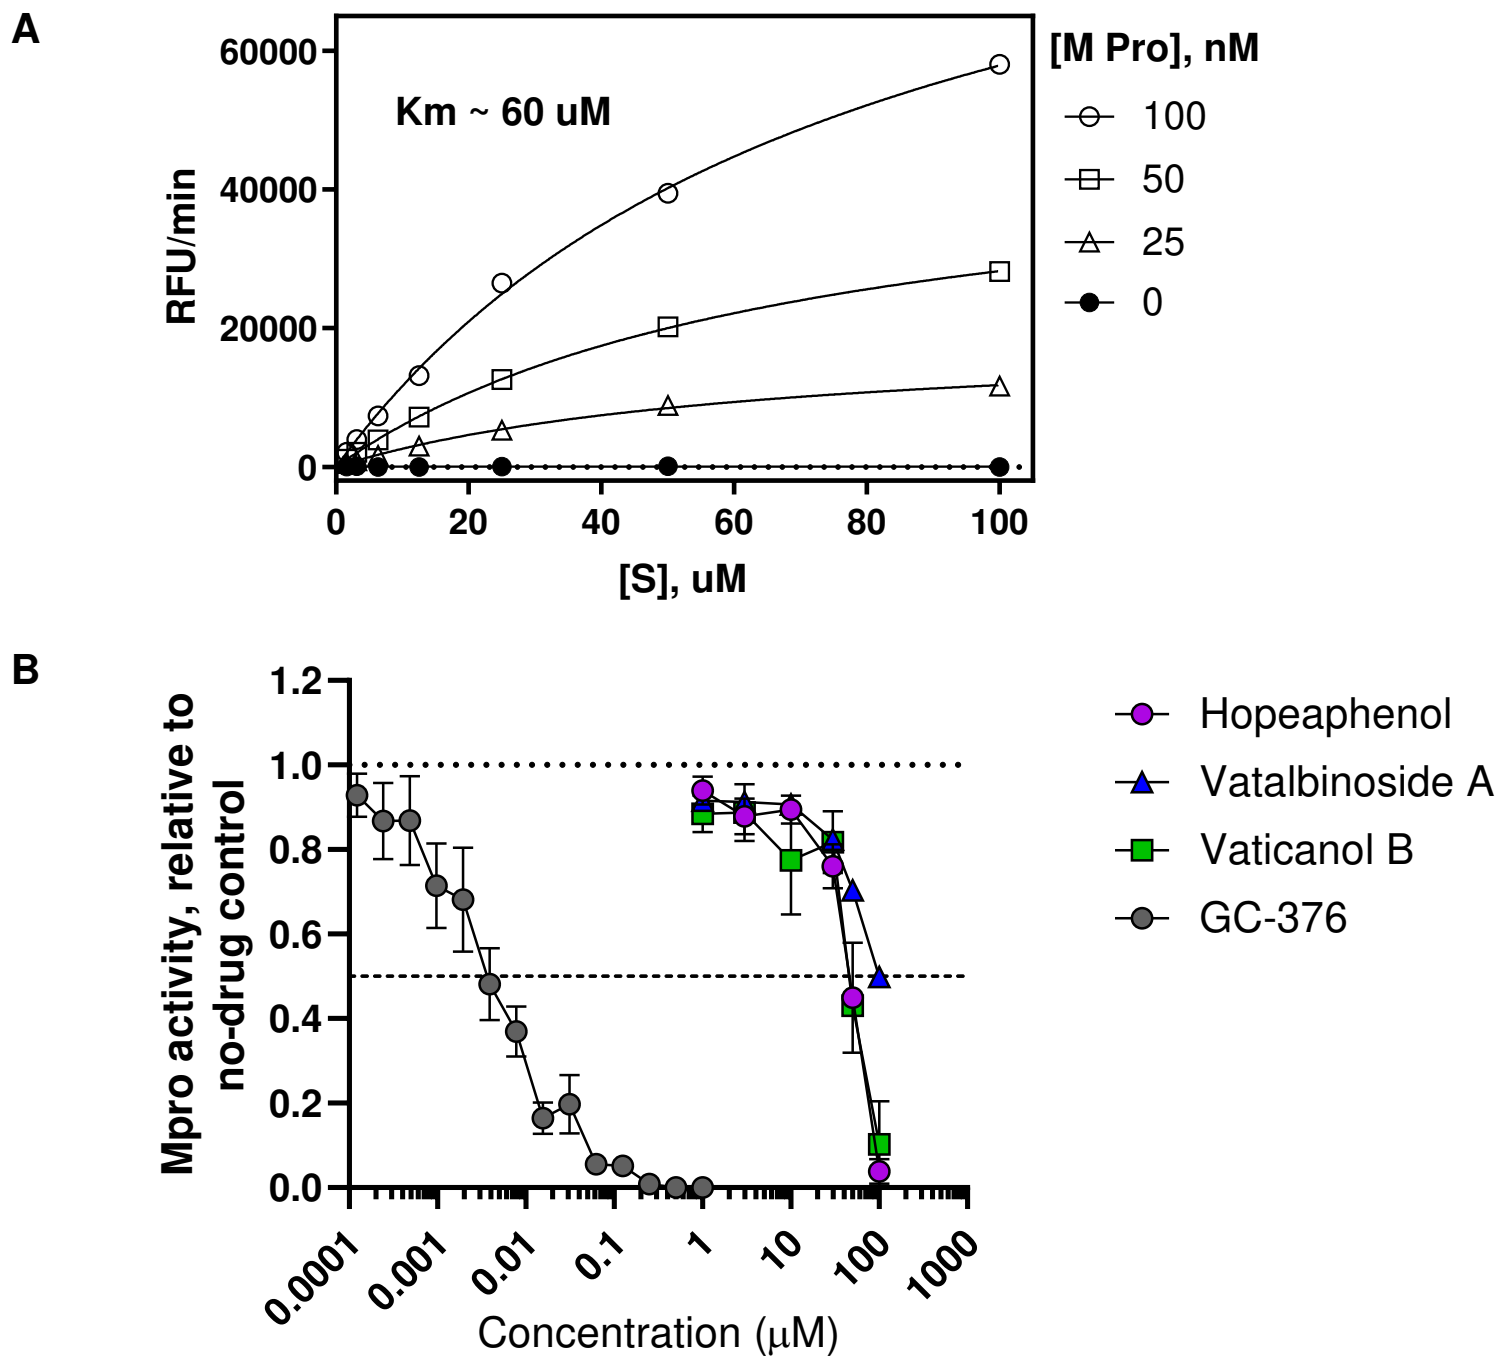

Figure 3

**A**

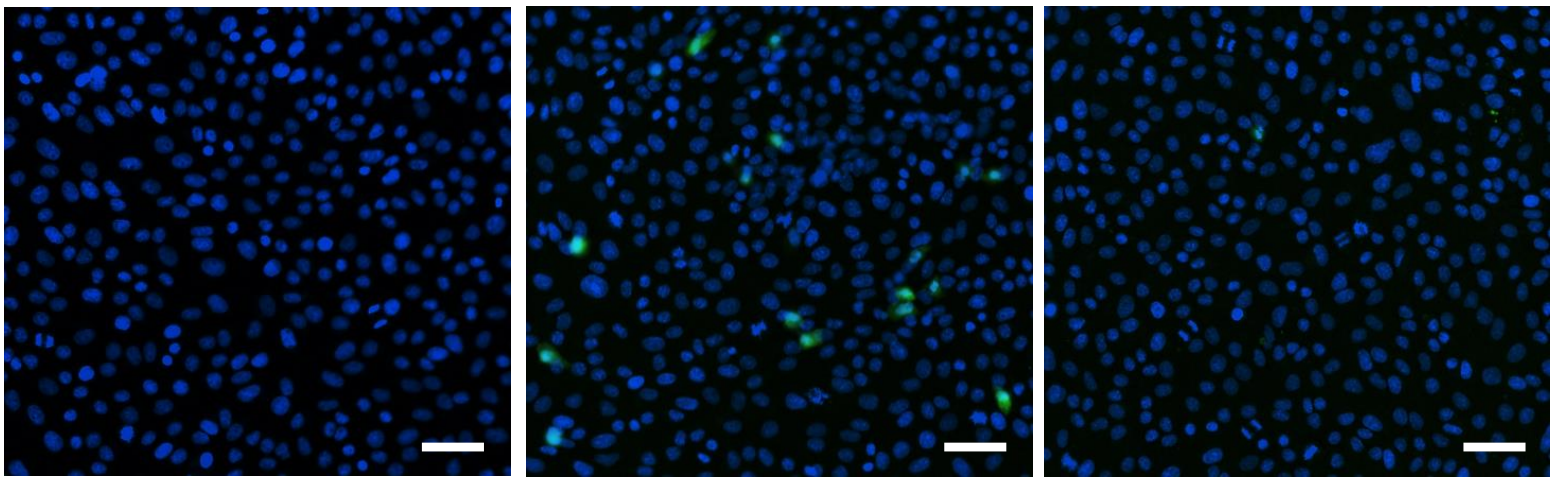

**B**

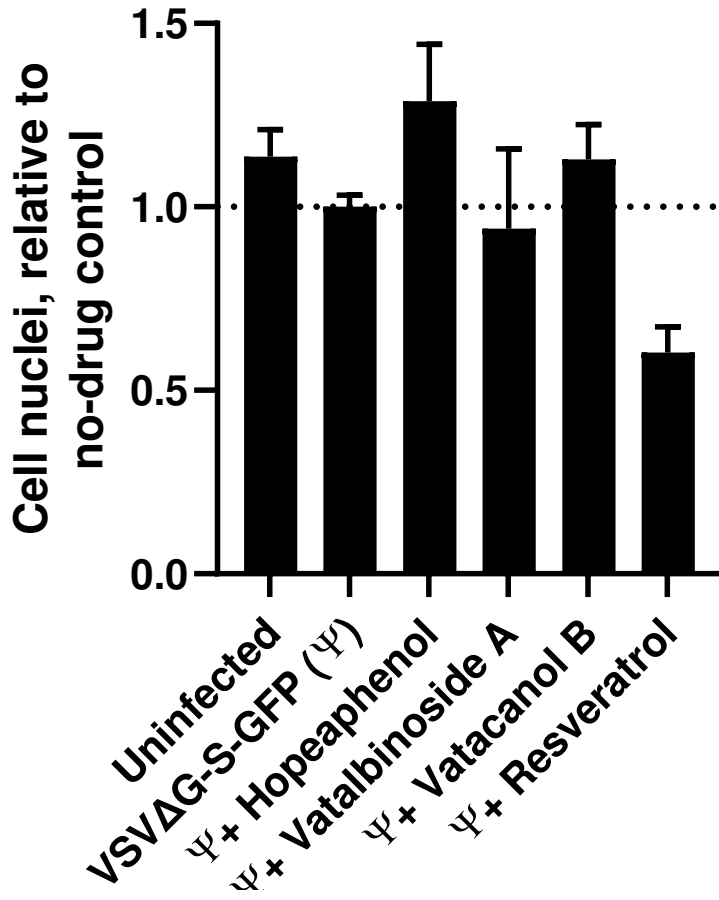

**C**

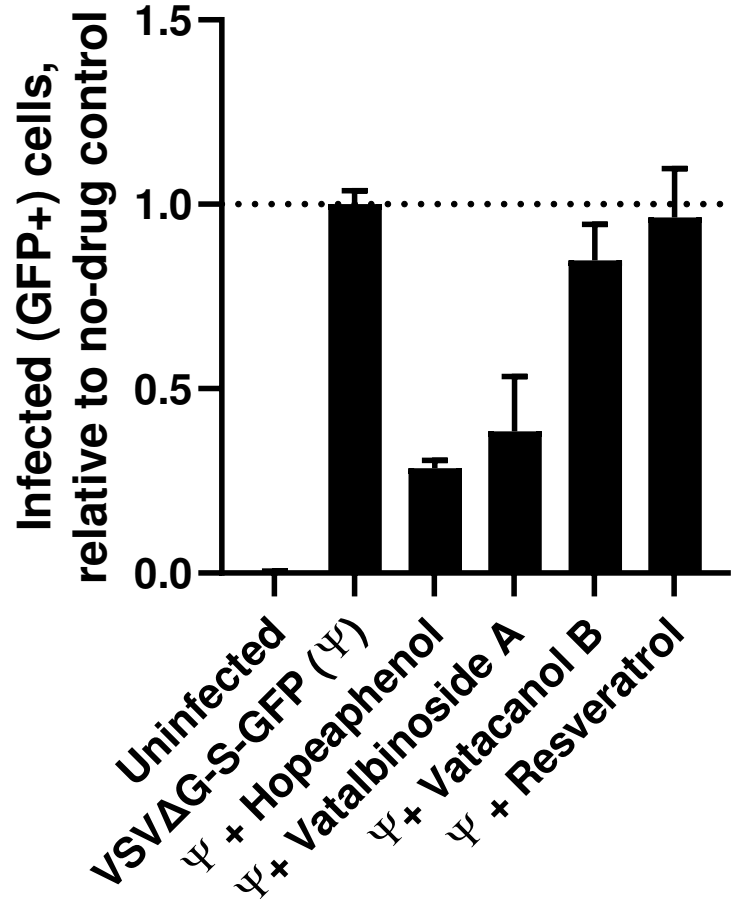

Figure 4

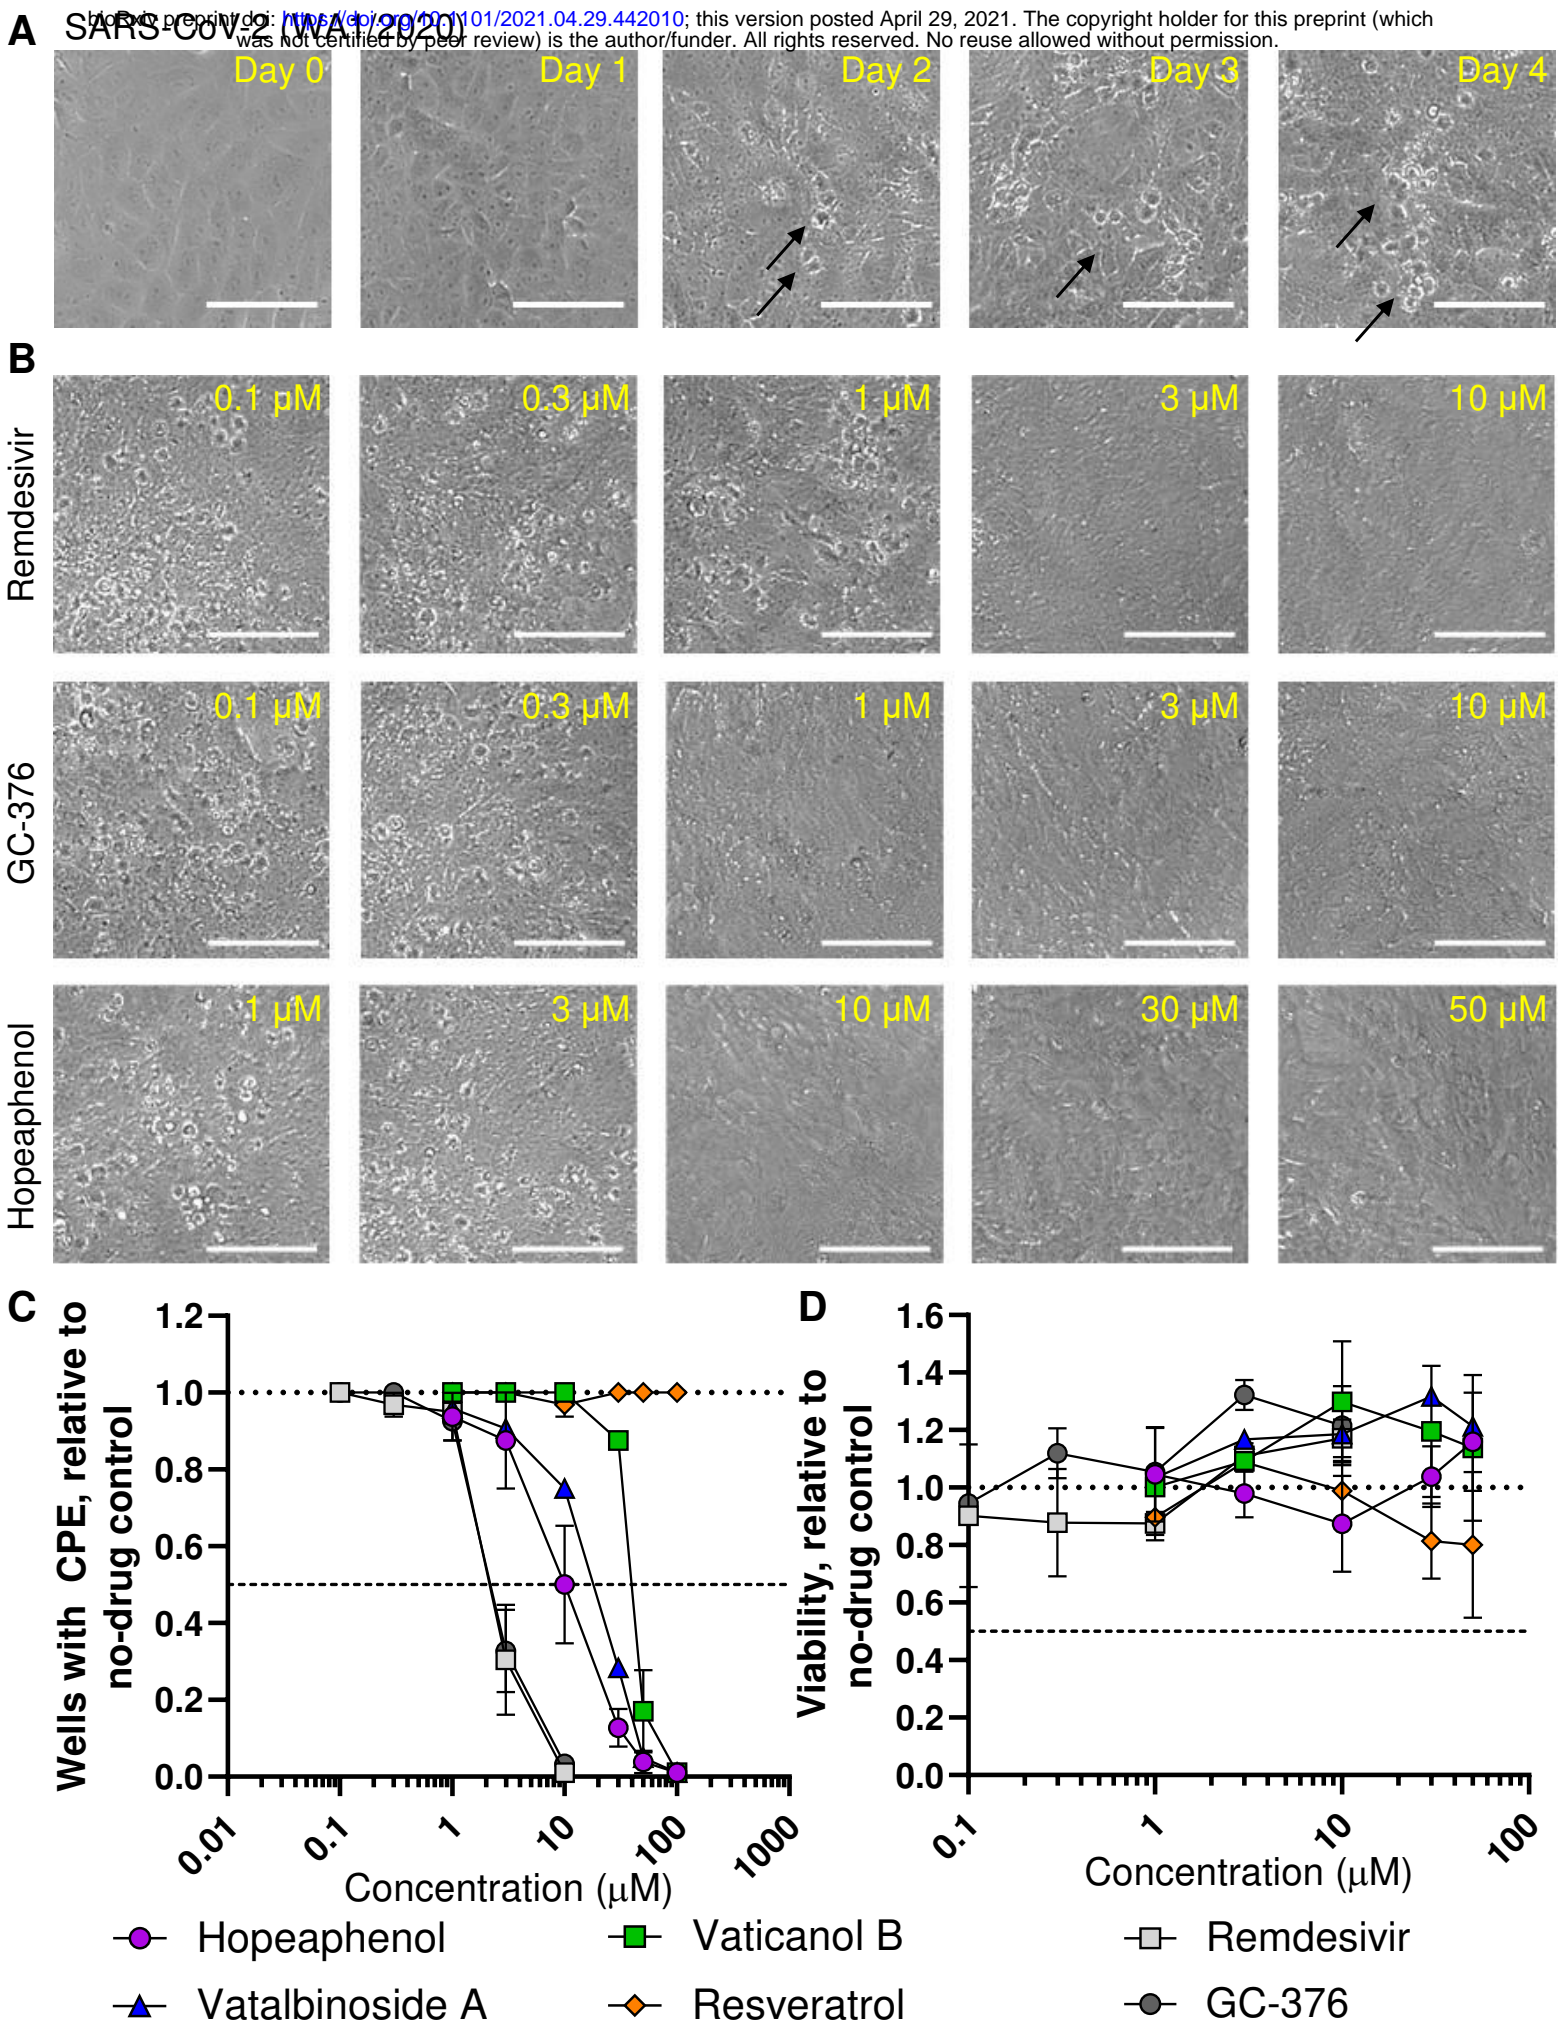

Figure 5



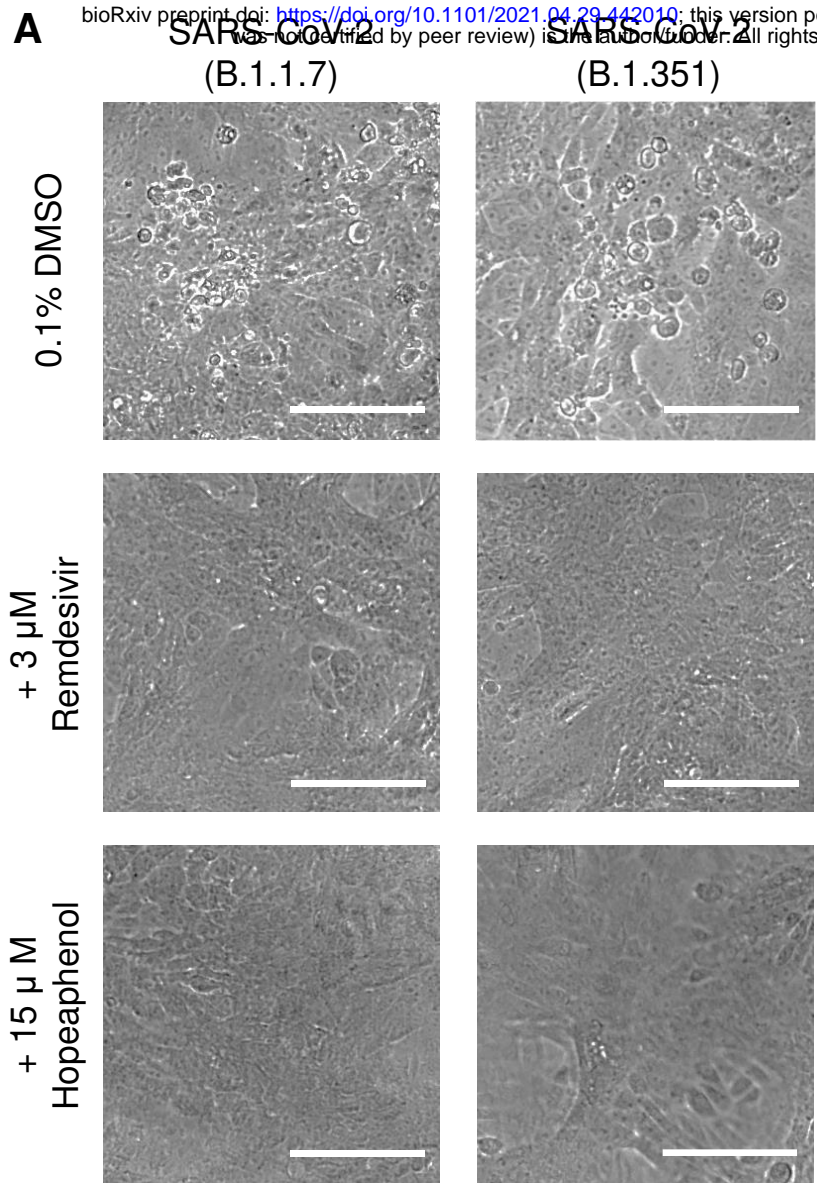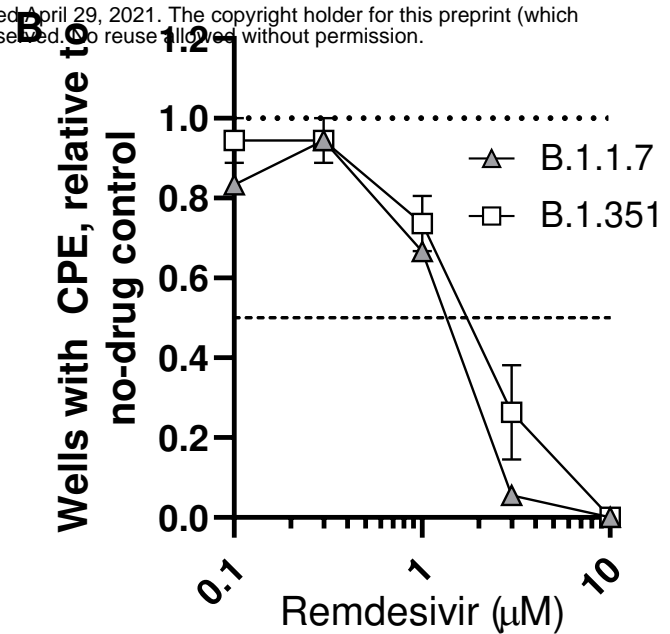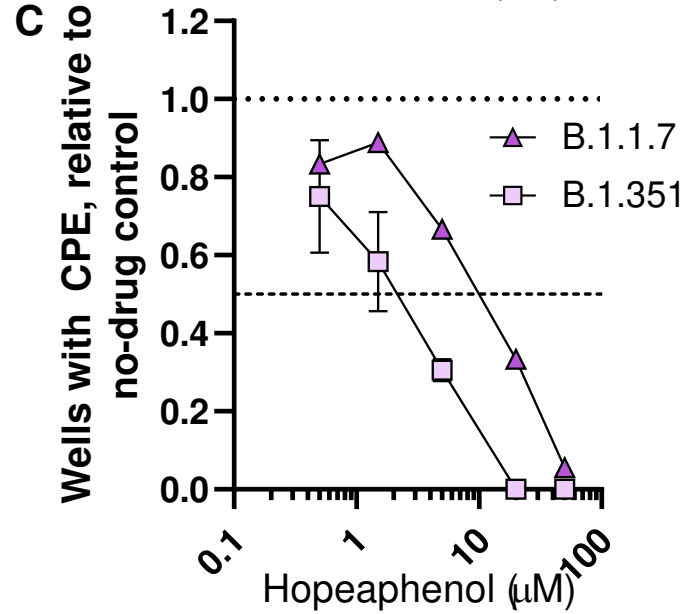

Figure 6

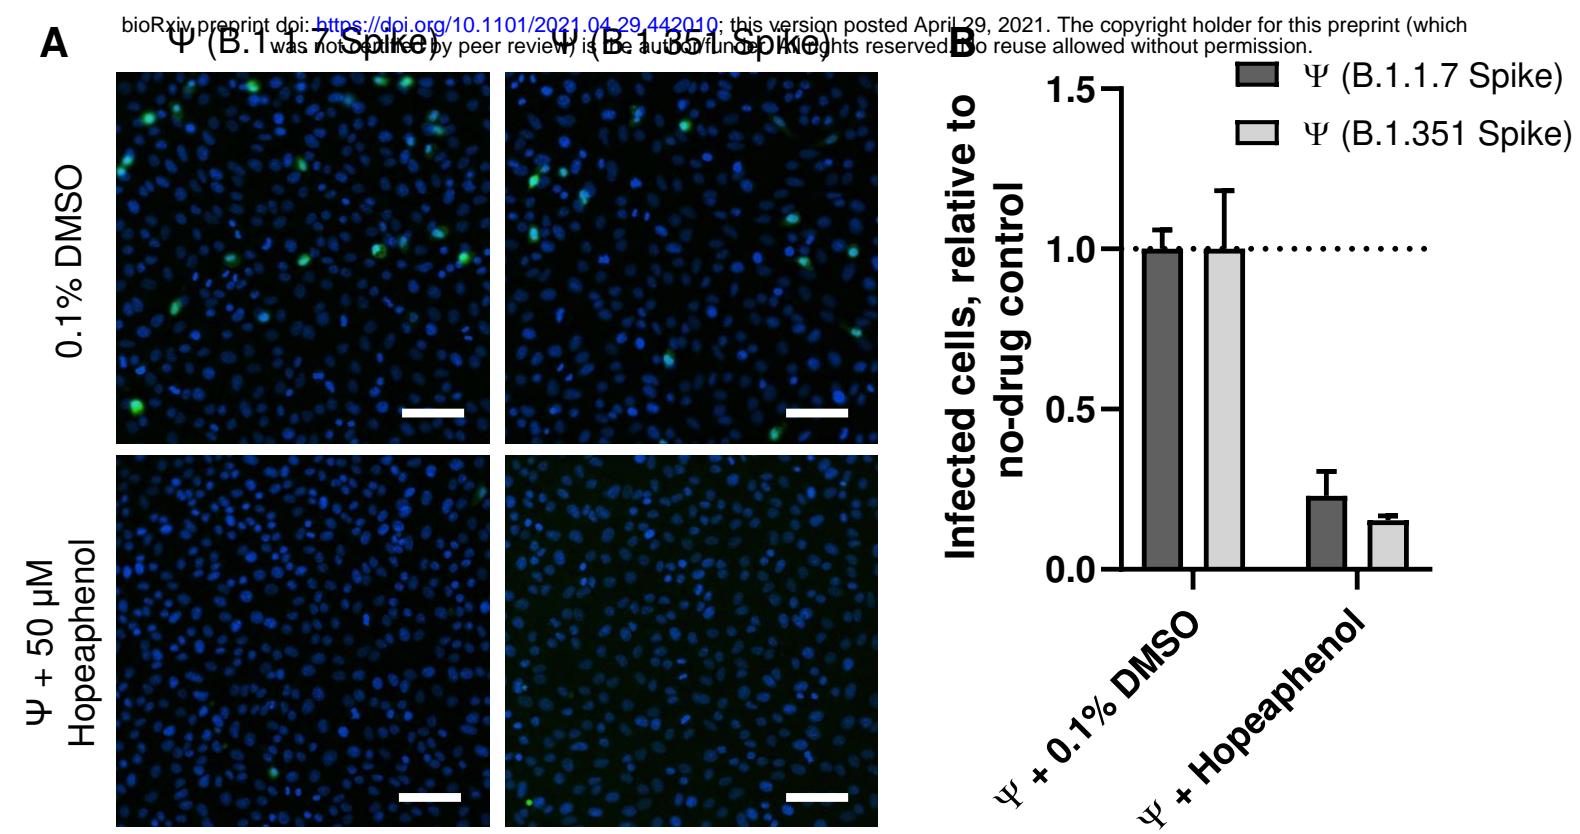

Figure 7
